# Supplementary material for: Identification of genes associated with survival of breast cancer patients
Source: Springer Nature journal article supplement (doi:10.1007/s12282-018-0926-9), 2018-10-19
Supplement: MOESM3 [file 16212838]

Table S1: The primer sequences.

| Genes | Primer sequence |
| --- | --- |
| SCUBE2 |  |
| Forward | 5'-CCAATGTGGTCTGTGTCAACC-3' |
| Reserve | 5'-GGAAGCAGGAAGTTCGACCA-3' |
| SCRN3 |  |
| Forward | 5'-TTCGTGGCATTACCTCCAGC-3' |
| Reserve | 5'-ATGTACACTTAAGACGTTCTCCCA-3' |
| YTHDF3 |  |
| Forward | 5'-CTGGAACAATCACTCGGCCA-3' |
| Reserve | 5'-CCTTGCCCTTTAGGTCTCTGA-3' |
| ITFG1 |  |
| Forward | 5'-CGTTGGTATTCCCCGTCCAT-3' |
| Reserve | 5'-CAGTTTGGCACTCCAACTTCG-3' |
| ITPRIPL2 |  |
| Forward | 5’-GTGGTATCCTAGCTCGTGCC-3’ |
| Reserve | 5’-CCTAAGAAGCTTGCACCCCA-3’ |
| JAK1 |  |
| Forward | 5'-ATGCATTTCTGCATCGAGCG-3' |
| Reserve | 5'-CAGAGAAGCGTGTGTCTCAGAA-3' |
| β-actin |  |
| Forward | 5’-CACCTTCTACAATGAGCTGCGTGTG-3’ |
| Reserve | 5’-ATAGCACAGCCTGGATAGCAACGTAC-3’ |
