# Supplementary material for: Identification of genes associated with survival of breast cancer patients
Source: Springer Nature journal article supplement (doi:10.1007/s12282-018-0926-9), 2018-10-19
Supplement: MOESM5 [file 16212838]

## Sheet: Table S3
Table S3 The miRNA/mRNA interactions predicted by both TargetScan and miRDB.
miRNAs	Target genes
hsa-miR-148b-3p	C18ORF25
hsa-miR-148b-3p	BMP3
hsa-miR-148b-3p	DOCK6
hsa-miR-148b-3p	DNAJC18
hsa-miR-148b-3p	S1PR1
hsa-miR-148b-3p	CERS6
hsa-miR-148b-3p	RASGRP1
hsa-miR-148b-3p	NAT8L
hsa-miR-148b-3p	RSBN1L
hsa-miR-148b-3p	SPTY2D1
hsa-miR-148b-3p	FAM73B
hsa-miR-148b-3p	BAG3
hsa-miR-148b-3p	TXNIP
hsa-miR-148b-3p	CHUK
hsa-miR-148b-3p	EYA3
hsa-miR-148b-3p	GLIPR2
hsa-miR-148b-3p	DCP2
hsa-miR-148b-3p	BCL2L11
hsa-miR-148b-3p	PPP1CB
hsa-miR-148b-3p	NCKIPSD
hsa-miR-148b-3p	SOS1
hsa-miR-148b-3p	ZDHHC17
hsa-miR-148b-3p	TMED7
hsa-miR-148b-3p	ATP11A
hsa-miR-148b-3p	PSMD9
hsa-miR-148b-3p	CHD9
hsa-miR-365b-3p	LCP2
hsa-miR-365b-3p	CLDN11
hsa-miR-148b-3p	RPS6KA5
hsa-miR-148b-3p	CELSR1
hsa-miR-365b-3p	KCNQ1
hsa-miR-365b-3p	MAPK1
hsa-miR-365b-3p	SIX4
hsa-miR-365b-3p	RP2
hsa-miR-365b-3p	MGA
hsa-miR-365b-3p	CSK
hsa-miR-365b-3p	NUFIP2
hsa-miR-365b-3p	RASD1
hsa-miR-365b-3p	AKAP10
hsa-miR-365b-3p	TNFAIP1
hsa-miR-365b-3p	CAP2
hsa-miR-365b-3p	DENND1B
hsa-miR-365b-3p	PAPOLG
hsa-miR-365b-3p	ACVR1C
hsa-miR-365b-3p	KCNJ2
hsa-miR-365b-3p	TMX4
hsa-miR-365b-3p	SLC38A2
hsa-miR-365b-3p	KLB
hsa-miR-365b-3p	EHF
hsa-miR-365b-3p	USP37
hsa-miR-365b-3p	DCUN1D5
hsa-miR-365b-3p	ADAM10
hsa-miR-365b-3p	TRHDE
hsa-miR-365b-3p	KLF3
hsa-miR-365b-3p	USP22
hsa-miR-365b-3p	RNF138
hsa-miR-365b-3p	IMPAD1
hsa-miR-365b-3p	PIK3R3
hsa-miR-365b-3p	AMMECR1
hsa-miR-365b-3p	IL1A
hsa-miR-365b-3p	ACVR1
hsa-miR-365b-3p	EPAS1
hsa-miR-365b-3p	DNAJC10
hsa-miR-365b-3p	MXD1
hsa-miR-365b-3p	SLC30A9
hsa-miR-365b-3p	ARRDC3
hsa-miR-365b-3p	PRKAR2A
hsa-miR-365b-3p	RBP5
hsa-miR-365b-3p	GPR84
hsa-miR-365b-3p	IGF1R
hsa-miR-365b-3p	VGLL4
hsa-miR-365b-3p	PLA1A
hsa-miR-365b-3p	KIAA0226
hsa-miR-365b-3p	ADD3
hsa-miR-365b-3p	ADM
hsa-miR-365b-3p	LIN7C
hsa-miR-365b-3p	DLAT
hsa-miR-365b-3p	ANK3
hsa-miR-365b-3p	DIP2C
hsa-miR-365b-3p	QTRTD1
hsa-miR-365b-3p	C18ORF25
hsa-miR-365b-3p	UBP1
hsa-miR-365b-3p	UNC5D
hsa-miR-365b-3p	HMGCR
hsa-miR-365b-3p	GFRA4
hsa-miR-365b-3p	BTG2
hsa-miR-365b-3p	HSF2BP
hsa-miR-365b-3p	FRZB
hsa-miR-365b-3p	PRKCI
hsa-miR-365b-3p	PCNP
hsa-miR-365b-3p	HHIP
hsa-miR-365b-3p	AFAP1L1
hsa-miR-365b-3p	LMTK2
hsa-miR-365b-3p	RGS20
hsa-miR-365b-3p	MYRIP
hsa-miR-365b-3p	SHE
hsa-miR-365b-3p	SOCS5
hsa-miR-365b-3p	C14ORF142
hsa-miR-365b-3p	TMOD3
hsa-miR-365b-3p	PCMTD2
hsa-miR-365b-3p	LCLAT1
hsa-miR-365b-3p	KIAA1239
hsa-miR-365b-3p	ARHGAP12
hsa-miR-365b-3p	RAB1B
hsa-miR-365b-3p	OXR1
hsa-miR-365b-3p	NR1D2
hsa-miR-365b-3p	MAK
hsa-miR-365b-3p	CCNG2
hsa-miR-365b-3p	B4GALT3
hsa-miR-365b-3p	EPC1
hsa-miR-365b-3p	HMGCS1
hsa-miR-365b-3p	C11ORF87
hsa-miR-365b-3p	COL7A1
hsa-miR-365b-3p	ZNF92
hsa-miR-365b-3p	GRPEL2
hsa-miR-365b-3p	LPAR5
hsa-miR-365b-3p	KCNH2
hsa-miR-365b-3p	TBK1
hsa-miR-365b-3p	FAM91A1
hsa-miR-365b-3p	ZNF486
hsa-miR-365b-3p	ZNRF1
hsa-miR-365b-3p	FNDC3B
hsa-miR-365b-3p	TASP1
hsa-miR-365b-3p	NR4A2
hsa-miR-365b-3p	TNC
hsa-miR-365b-3p	C2ORF88
hsa-miR-365b-3p	KCNK10
hsa-miR-365b-3p	ARMCX3
hsa-miR-365b-3p	ASTN2
hsa-miR-365b-3p	PRLR
hsa-miR-365b-3p	NR3C2
hsa-miR-365b-3p	ETS1
hsa-miR-365b-3p	MTMR2
hsa-miR-365b-3p	RAC1
hsa-miR-365b-3p	MYLIP
hsa-miR-365b-3p	LMBR1
hsa-miR-365b-3p	NFAT5
hsa-miR-365b-3p	NKX2-1
hsa-miR-365b-3p	C7ORF55-LUC7L2
hsa-miR-365b-3p	SRGAP1
hsa-miR-365b-3p	ERCC6
hsa-miR-365b-3p	ZNF708
hsa-miR-365b-3p	SYNJ1
hsa-miR-365b-3p	RICTOR
hsa-miR-365b-3p	CREB5
hsa-miR-365b-3p	TLL2
hsa-miR-365b-3p	GRAMD1C
hsa-miR-365b-3p	WDR37
hsa-miR-365b-3p	ANKRD17
hsa-miR-365b-3p	PRDM10
hsa-miR-365b-3p	ZSWIM5
hsa-miR-365b-3p	ATG2B
hsa-miR-365b-3p	FAM3C
hsa-miR-365b-3p	ANKS1A
hsa-miR-365b-3p	ZNF148
hsa-miR-365b-3p	MYLK
hsa-miR-365b-3p	LDB1
hsa-miR-365b-3p	ST6GAL2
hsa-miR-365b-3p	E2F2
hsa-miR-365b-3p	KIAA1737
hsa-miR-365b-3p	AKT3
hsa-miR-365b-3p	ZBTB41
hsa-miR-365b-3p	SGK1
hsa-miR-365b-3p	RIT1
hsa-miR-365b-3p	REV3L
hsa-miR-365b-3p	PRDM1
hsa-miR-365b-3p	SH3BGRL2
hsa-miR-365b-3p	PRMT6
hsa-miR-365b-3p	ZNF644
hsa-miR-365b-3p	ENTPD7
hsa-miR-365b-3p	MCOLN2
hsa-miR-365b-3p	BAG2
hsa-miR-365b-3p	USP33
hsa-miR-365b-3p	ROR1
hsa-miR-365b-3p	GLYATL3
hsa-miR-365b-3p	LAMP2
hsa-miR-365b-3p	ENPP5
hsa-miR-365b-3p	CEP55
hsa-miR-365b-3p	LRIT2
hsa-miR-365b-3p	PLTP
hsa-miR-365b-3p	ZMPSTE24
hsa-miR-365b-3p	TOMM34
hsa-miR-365b-3p	YRDC
hsa-miR-365b-3p	CDK9
hsa-miR-365b-3p	YTHDF2
hsa-miR-365b-3p	BSPRY
hsa-miR-365b-3p	FSD1L
hsa-miR-365b-3p	TP53INP2
hsa-miR-365b-3p	TFDP1
hsa-miR-365b-3p	STXBP4
hsa-miR-365b-3p	UBAC2
hsa-miR-365b-3p	PRUNE2
hsa-miR-365b-3p	VPS36
hsa-miR-365b-3p	DFFB
hsa-miR-365b-3p	ANKRD11
hsa-miR-365b-3p	DCDC2
hsa-miR-365b-3p	PLCB4
hsa-miR-365b-3p	ARRDC2
hsa-miR-365b-3p	CXORF23
hsa-miR-365b-3p	RHOBTB3
hsa-miR-365b-3p	IGF2
hsa-miR-365b-3p	KLRD1
hsa-miR-365b-3p	RAD1
hsa-miR-365b-3p	DCP2
hsa-miR-365b-3p	TP63
hsa-miR-365b-3p	USP45
hsa-miR-365b-3p	SCN3B
hsa-miR-365b-3p	TADA2A
hsa-miR-365b-3p	LARS
hsa-miR-365b-3p	EFEMP1
hsa-miR-365b-3p	PHF15
hsa-miR-365b-3p	SLC43A3
hsa-miR-365b-3p	MAPK1IP1L
hsa-miR-365b-3p	MYD88
hsa-miR-365b-3p	HOXA9
hsa-miR-365b-3p	YWHAH
hsa-miR-365b-3p	ARHGEF12
hsa-miR-365b-3p	VGLL3
hsa-miR-365b-3p	GXYLT1
hsa-miR-365b-3p	KIAA2026
hsa-miR-365b-3p	USP48
hsa-miR-365b-3p	RBM11
hsa-miR-365b-3p	XPO4
hsa-miR-365b-3p	RASGRP3
hsa-miR-365b-3p	COMMD5
hsa-miR-365b-3p	ESRRA
hsa-miR-365b-3p	INPP4A
hsa-miR-365b-3p	RAPGEF4
hsa-miR-365b-3p	SPIRE1
hsa-miR-365b-3p	PRPF40A
hsa-miR-365b-3p	PRR23C
hsa-miR-365b-3p	TMEM130
hsa-miR-365b-3p	PAX6
hsa-miR-365b-3p	TBCEL
hsa-miR-365b-3p	TOP2A
hsa-miR-365b-3p	SESTD1
hsa-miR-365b-3p	ETV1
hsa-miR-365b-3p	DLX3
hsa-miR-365b-3p	SLC22A23
hsa-miR-365b-3p	PLEKHB2
hsa-miR-365b-3p	OSGIN2
hsa-miR-365b-3p	KLHL24
hsa-miR-365b-3p	SLC6A6
hsa-miR-365b-3p	EVI2A
hsa-miR-365b-3p	TIAM2
hsa-miR-365b-3p	SYPL1
hsa-miR-365b-3p	ZNF782
hsa-miR-365b-3p	CDKN2A
hsa-miR-365b-3p	CNOT6L
hsa-miR-365b-3p	PKD2L2
hsa-miR-365b-3p	LYSMD3
hsa-miR-365b-3p	STARD4
hsa-miR-365b-3p	C8ORF44-SGK3
hsa-miR-365b-3p	KCNK9
hsa-miR-365b-3p	TRAM1
hsa-miR-365b-3p	MEX3A
hsa-miR-365b-3p	MS4A1
hsa-miR-365b-3p	FAR2
hsa-miR-365b-3p	RASSF8
hsa-miR-365b-3p	LUC7L2
hsa-miR-365b-3p	PPFIA2
hsa-miR-365b-3p	FRS2
hsa-miR-365b-3p	CNTN1
hsa-miR-365b-3p	OAZ2
hsa-miR-365b-3p	TMEM178B
hsa-miR-365b-3p	ARRB2
hsa-miR-365b-3p	PHF12
hsa-miR-365b-3p	DPY19L3
hsa-miR-365b-3p	NUDT3
hsa-miR-193a-5p	KIAA2022
hsa-miR-193a-5p	MYO15A
hsa-miR-193a-5p	KDELR3
hsa-miR-193a-5p	CYP4F3
hsa-miR-193a-5p	CYP4F2
hsa-miR-193a-5p	CD82
hsa-miR-193a-5p	RAP2A
hsa-miR-193a-5p	CDADC1
hsa-miR-193a-5p	EIF2S1
hsa-miR-193a-5p	SLC38A2
hsa-miR-193a-5p	BAAT
hsa-miR-193a-5p	DMRT2
hsa-miR-193a-5p	DIRC2
hsa-miR-193a-5p	ACVR1
hsa-miR-193a-5p	PCDH10
hsa-miR-193a-5p	CUL3
hsa-miR-193a-5p	MGAT4A
hsa-miR-193a-5p	TMTC3
hsa-miR-193a-5p	KCNH1
hsa-miR-193a-5p	RPS3
hsa-miR-193a-5p	C18ORF25
hsa-miR-193a-5p	JAZF1
hsa-miR-193a-5p	FAM167A
hsa-miR-193a-5p	OLA1
hsa-miR-193a-5p	GNAQ
hsa-miR-193a-5p	IPPK
hsa-miR-193a-5p	TRAT1
hsa-miR-193a-5p	JAKMIP3
hsa-miR-193a-5p	BEAN1
hsa-miR-193a-5p	DACT3
hsa-miR-193a-5p	ZNF641
hsa-miR-193a-5p	PCDHA10
hsa-miR-193a-5p	VEGFB
hsa-miR-193a-5p	MKL2
hsa-miR-193a-5p	RBBP6
hsa-miR-193a-5p	CEP57
hsa-miR-193a-5p	PAPPA
hsa-miR-193a-5p	DHX34
hsa-miR-193a-5p	ZNRD1
hsa-miR-193a-5p	MRPL35
hsa-miR-193a-5p	RHOBTB1
hsa-miR-193a-5p	PPP1R17
hsa-miR-193a-5p	LMX1A
hsa-miR-193a-5p	SPRY4
hsa-miR-193a-5p	GANAB
hsa-miR-193a-5p	NET1
hsa-miR-193a-5p	NEGR1
hsa-miR-193a-5p	PLCG2
hsa-miR-193a-5p	NID1
hsa-miR-193a-5p	THEMIS
hsa-miR-193a-5p	BRCC3
hsa-miR-193a-5p	OLFM3
hsa-miR-193a-5p	YTHDF1
hsa-miR-193a-5p	OGFRL1
hsa-miR-193a-5p	CLCA2
hsa-miR-193a-5p	LHFPL1
hsa-miR-193a-5p	TMEM254
hsa-miR-193a-5p	RBM41
hsa-miR-193a-5p	SYNPO2L
hsa-miR-193a-5p	TAF7L
hsa-miR-193a-5p	SGPL1
hsa-miR-193a-5p	SP5
hsa-miR-193a-5p	GBA2
hsa-miR-193a-5p	RASSF2
hsa-miR-193a-5p	DDX58
hsa-miR-193a-5p	SHROOM2
hsa-miR-193a-5p	NLN
hsa-miR-193a-5p	TNFRSF19
hsa-miR-193a-5p	NKIRAS1
hsa-miR-193a-5p	TP63
hsa-miR-193a-5p	WARS
hsa-miR-193a-5p	ANO4
hsa-miR-193a-5p	P2RY6
hsa-miR-193a-5p	STAMBP
hsa-miR-193a-5p	ADH6
hsa-miR-193a-5p	FXN
hsa-miR-193a-5p	SLC30A5
hsa-miR-193a-5p	ADAM22
hsa-miR-193a-5p	ACBD4
hsa-miR-193a-5p	PCDHA12
hsa-miR-193a-5p	PCDHA11
hsa-miR-193a-5p	UBE2D2
hsa-miR-193a-5p	SMAD9
hsa-miR-193a-5p	LDLRAD4
hsa-miR-193a-5p	KIAA1671
hsa-miR-193a-5p	LACTB
hsa-miR-193a-5p	GOLGA6B
hsa-miR-193a-5p	ATF5
hsa-miR-193a-5p	SNX13
hsa-miR-193a-5p	ZNHIT6
hsa-miR-193a-5p	KCNMB2
hsa-miR-193a-5p	GOLGA6D
hsa-miR-193a-5p	GATS
hsa-miR-193a-5p	ATCAY
hsa-miR-193a-5p	IFFO2
hsa-miR-193a-5p	SULF1
hsa-miR-193a-5p	NOVA1
hsa-miR-193a-5p	MYSM1
hsa-miR-193a-5p	PCDHA1
hsa-miR-193a-5p	PCDHA3
hsa-miR-193a-5p	PCDHA7
hsa-miR-193a-5p	PCDHA2
hsa-miR-193a-5p	DSCAML1
hsa-miR-193a-5p	PCDHA6
hsa-miR-193a-5p	PCDHA5
hsa-miR-193a-5p	KLK12
hsa-miR-193a-5p	PCDHA9
hsa-miR-193a-5p	CLP1
hsa-miR-193a-5p	CPEB2
hsa-miR-193a-5p	SCAMP1
hsa-miR-193a-5p	BLID
hsa-miR-193a-5p	NETO2
hsa-miR-193a-5p	HSPB6
hsa-miR-193a-5p	ZNF628
hsa-miR-365a-3p	LCP2
hsa-miR-365a-3p	CLDN11
hsa-miR-365a-3p	KCNQ1
hsa-miR-365a-3p	MAPK1
hsa-miR-365a-3p	SIX4
hsa-miR-365a-3p	RP2
hsa-miR-365a-3p	MGA
hsa-miR-365a-3p	CSK
hsa-miR-365a-3p	NUFIP2
hsa-miR-365a-3p	RASD1
hsa-miR-365a-3p	AKAP10
hsa-miR-365a-3p	TNFAIP1
hsa-miR-365a-3p	CAP2
hsa-miR-365a-3p	DENND1B
hsa-miR-365a-3p	PAPOLG
hsa-miR-365a-3p	ACVR1C
hsa-miR-365a-3p	KCNJ2
hsa-miR-365a-3p	TMX4
hsa-miR-365a-3p	SLC38A2
hsa-miR-365a-3p	KLB
hsa-miR-365a-3p	EHF
hsa-miR-365a-3p	USP37
hsa-miR-365a-3p	DCUN1D5
hsa-miR-365a-3p	ADAM10
hsa-miR-365a-3p	TRHDE
hsa-miR-365a-3p	KLF3
hsa-miR-365a-3p	USP22
hsa-miR-365a-3p	RNF138
hsa-miR-365a-3p	IMPAD1
hsa-miR-365a-3p	PIK3R3
hsa-miR-365a-3p	AMMECR1
hsa-miR-365a-3p	IL1A
hsa-miR-365a-3p	ACVR1
hsa-miR-365a-3p	EPAS1
hsa-miR-365a-3p	DNAJC10
hsa-miR-365a-3p	MXD1
hsa-miR-365a-3p	SLC30A9
hsa-miR-365a-3p	ARRDC3
hsa-miR-365a-3p	PRKAR2A
hsa-miR-365a-3p	RBP5
hsa-miR-365a-3p	GPR84
hsa-miR-365a-3p	IGF1R
hsa-miR-365a-3p	VGLL4
hsa-miR-365a-3p	PLA1A
hsa-miR-365a-3p	KIAA0226
hsa-miR-365a-3p	ADD3
hsa-miR-365a-3p	ADM
hsa-miR-365a-3p	LIN7C
hsa-miR-365a-3p	DLAT
hsa-miR-365a-3p	ANK3
hsa-miR-365a-3p	DIP2C
hsa-miR-365a-3p	QTRTD1
hsa-miR-365a-3p	C18ORF25
hsa-miR-365a-3p	UBP1
hsa-miR-365a-3p	UNC5D
hsa-miR-365a-3p	HMGCR
hsa-miR-365a-3p	GFRA4
hsa-miR-365a-3p	BTG2
hsa-miR-365a-3p	HSF2BP
hsa-miR-365a-3p	FRZB
hsa-miR-365a-3p	PRKCI
hsa-miR-365a-3p	PCNP
hsa-miR-365a-3p	HHIP
hsa-miR-365a-3p	AFAP1L1
hsa-miR-365a-3p	LMTK2
hsa-miR-365a-3p	RGS20
hsa-miR-365a-3p	MYRIP
hsa-miR-365a-3p	SHE
hsa-miR-365a-3p	SOCS5
hsa-miR-365a-3p	C14ORF142
hsa-miR-365a-3p	TMOD3
hsa-miR-365a-3p	PCMTD2
hsa-miR-365a-3p	LCLAT1
hsa-miR-365a-3p	KIAA1239
hsa-miR-365a-3p	ARHGAP12
hsa-miR-365a-3p	RAB1B
hsa-miR-365a-3p	OXR1
hsa-miR-365a-3p	NR1D2
hsa-miR-365a-3p	MAK
hsa-miR-365a-3p	CCNG2
hsa-miR-365a-3p	B4GALT3
hsa-miR-365a-3p	EPC1
hsa-miR-365a-3p	HMGCS1
hsa-miR-365a-3p	C11ORF87
hsa-miR-365a-3p	COL7A1
hsa-miR-365a-3p	ZNF92
hsa-miR-365a-3p	GRPEL2
hsa-miR-365a-3p	LPAR5
hsa-miR-365a-3p	KCNH2
hsa-miR-365a-3p	TBK1
hsa-miR-365a-3p	FAM91A1
hsa-miR-365a-3p	ZNF486
hsa-miR-365a-3p	ZNRF1
hsa-miR-365a-3p	FNDC3B
hsa-miR-365a-3p	TASP1
hsa-miR-365a-3p	NR4A2
hsa-miR-365a-3p	TNC
hsa-miR-365a-3p	C2ORF88
hsa-miR-365a-3p	KCNK10
hsa-miR-365a-3p	ARMCX3
hsa-miR-365a-3p	ASTN2
hsa-miR-365a-3p	PRLR
hsa-miR-365a-3p	NR3C2
hsa-miR-365a-3p	ETS1
hsa-miR-365a-3p	MTMR2
hsa-miR-365a-3p	RAC1
hsa-miR-365a-3p	MYLIP
hsa-miR-365a-3p	LMBR1
hsa-miR-365a-3p	NFAT5
hsa-miR-365a-3p	NKX2-1
hsa-miR-365a-3p	C7ORF55-LUC7L2
hsa-miR-365a-3p	SRGAP1
hsa-miR-365a-3p	ERCC6
hsa-miR-365a-3p	ZNF708
hsa-miR-365a-3p	SYNJ1
hsa-miR-365a-3p	RICTOR
hsa-miR-365a-3p	CREB5
hsa-miR-365a-3p	TLL2
hsa-miR-365a-3p	GRAMD1C
hsa-miR-365a-3p	WDR37
hsa-miR-365a-3p	ANKRD17
hsa-miR-365a-3p	PRDM10
hsa-miR-365a-3p	ZSWIM5
hsa-miR-365a-3p	ATG2B
hsa-miR-365a-3p	FAM3C
hsa-miR-365a-3p	ANKS1A
hsa-miR-365a-3p	ZNF148
hsa-miR-365a-3p	MYLK
hsa-miR-365a-3p	LDB1
hsa-miR-365a-3p	ST6GAL2
hsa-miR-365a-3p	E2F2
hsa-miR-365a-3p	KIAA1737
hsa-miR-365a-3p	AKT3
hsa-miR-365a-3p	ZBTB41
hsa-miR-365a-3p	SGK1
hsa-miR-365a-3p	RIT1
hsa-miR-365a-3p	REV3L
hsa-miR-365a-3p	PRDM1
hsa-miR-365a-3p	SH3BGRL2
hsa-miR-365a-3p	PRMT6
hsa-miR-365a-3p	ZNF644
hsa-miR-365a-3p	ENTPD7
hsa-miR-365a-3p	MCOLN2
hsa-miR-365a-3p	BAG2
hsa-miR-365a-3p	USP33
hsa-miR-365a-3p	ROR1
hsa-miR-365a-3p	GLYATL3
hsa-miR-365a-3p	LAMP2
hsa-miR-365a-3p	ENPP5
hsa-miR-365a-3p	CEP55
hsa-miR-365a-3p	LRIT2
hsa-miR-365a-3p	PLTP
hsa-miR-365a-3p	ZMPSTE24
hsa-miR-365a-3p	TOMM34
hsa-miR-365a-3p	YRDC
hsa-miR-365a-3p	CDK9
hsa-miR-365a-3p	YTHDF2
hsa-miR-365a-3p	BSPRY
hsa-miR-365a-3p	FSD1L
hsa-miR-365a-3p	TP53INP2
hsa-miR-365a-3p	TFDP1
hsa-miR-365a-3p	STXBP4
hsa-miR-365a-3p	UBAC2
hsa-miR-365a-3p	PRUNE2
hsa-miR-365a-3p	VPS36
hsa-miR-365a-3p	DFFB
hsa-miR-365a-3p	ANKRD11
hsa-miR-365a-3p	DCDC2
hsa-miR-365a-3p	PLCB4
hsa-miR-365a-3p	ARRDC2
hsa-miR-365a-3p	CXORF23
hsa-miR-365a-3p	RHOBTB3
hsa-miR-365a-3p	IGF2
hsa-miR-365a-3p	KLRD1
hsa-miR-365a-3p	RAD1
hsa-miR-365a-3p	DCP2
hsa-miR-365a-3p	TP63
hsa-miR-365a-3p	USP45
hsa-miR-365a-3p	SCN3B
hsa-miR-365a-3p	TADA2A
hsa-miR-365a-3p	LARS
hsa-miR-365a-3p	EFEMP1
hsa-miR-365a-3p	PHF15
hsa-miR-365a-3p	SLC43A3
hsa-miR-365a-3p	MAPK1IP1L
hsa-miR-365a-3p	MYD88
hsa-miR-365a-3p	HOXA9
hsa-miR-365a-3p	YWHAH
hsa-miR-365a-3p	ARHGEF12
hsa-miR-365a-3p	VGLL3
hsa-miR-365a-3p	GXYLT1
hsa-miR-365a-3p	KIAA2026
hsa-miR-365a-3p	USP48
hsa-miR-365a-3p	RBM11
hsa-miR-365a-3p	XPO4
hsa-miR-365a-3p	RASGRP3
hsa-miR-365a-3p	COMMD5
hsa-miR-365a-3p	ESRRA
hsa-miR-365a-3p	INPP4A
hsa-miR-365a-3p	RAPGEF4
hsa-miR-365a-3p	SPIRE1
hsa-miR-365a-3p	PRPF40A
hsa-miR-365a-3p	PRR23C
hsa-miR-365a-3p	TMEM130
hsa-miR-365a-3p	PAX6
hsa-miR-365a-3p	TBCEL
hsa-miR-365a-3p	TOP2A
hsa-miR-365a-3p	SESTD1
hsa-miR-365a-3p	ETV1
hsa-miR-365a-3p	DLX3
hsa-miR-365a-3p	SLC22A23
hsa-miR-365a-3p	PLEKHB2
hsa-miR-365a-3p	OSGIN2
hsa-miR-365a-3p	KLHL24
hsa-miR-365a-3p	SLC6A6
hsa-miR-365a-3p	EVI2A
hsa-miR-365a-3p	TIAM2
hsa-miR-365a-3p	SYPL1
hsa-miR-365a-3p	ZNF782
hsa-miR-365a-3p	CDKN2A
hsa-miR-365a-3p	CNOT6L
hsa-miR-365a-3p	PKD2L2
hsa-miR-365a-3p	LYSMD3
hsa-miR-365a-3p	STARD4
hsa-miR-365a-3p	C8ORF44-SGK3
hsa-miR-365a-3p	KCNK9
hsa-miR-365a-3p	TRAM1
hsa-miR-365a-3p	MEX3A
hsa-miR-365a-3p	MS4A1
hsa-miR-365a-3p	FAR2
hsa-miR-365a-3p	RASSF8
hsa-miR-365a-3p	LUC7L2
hsa-miR-365a-3p	PPFIA2
hsa-miR-365a-3p	FRS2
hsa-miR-365a-3p	CNTN1
hsa-miR-365a-3p	OAZ2
hsa-miR-365a-3p	TMEM178B
hsa-miR-365a-3p	ARRB2
hsa-miR-365a-3p	PHF12
hsa-miR-365a-3p	DPY19L3
hsa-miR-365a-3p	NUDT3
hsa-miR-21-3p	AKAP11
hsa-miR-21-3p	CDC27
hsa-miR-21-3p	ST13
hsa-miR-21-3p	PHF5A
hsa-miR-21-3p	YAE1D1
hsa-miR-21-3p	CCSER2
hsa-miR-21-3p	CREBL2
hsa-miR-21-3p	GNB4
hsa-miR-21-3p	NEK9
hsa-miR-21-3p	YIPF4
hsa-miR-21-3p	NFYB
hsa-miR-21-3p	TFG
hsa-miR-21-3p	FYTTD1
hsa-miR-21-3p	GNAZ
hsa-miR-21-3p	LRRC17
hsa-miR-21-3p	ERI1
hsa-miR-21-3p	ZC3H4
hsa-miR-21-3p	GSE1
hsa-miR-21-3p	HRH4
hsa-miR-21-3p	RINT1
hsa-miR-21-3p	RCBTB1
hsa-miR-21-3p	SRSF1
hsa-miR-21-3p	KAT7
hsa-miR-21-3p	GAD2
hsa-miR-21-3p	BCAT1
hsa-miR-21-3p	EPB41L4A
hsa-miR-21-3p	IPO5
hsa-miR-21-3p	PSMD11
hsa-miR-21-3p	KAL1
hsa-miR-21-3p	PGS1
hsa-miR-21-3p	PPM1F
hsa-miR-21-3p	EPAS1
hsa-miR-21-3p	CHIC2
hsa-miR-21-3p	CBL
hsa-miR-21-3p	PAICS
hsa-miR-21-3p	COBL
hsa-miR-21-3p	CDK6
hsa-miR-21-3p	DAXX
hsa-miR-21-3p	AMIGO2
hsa-miR-21-3p	MYZAP
hsa-miR-21-3p	RABL3
hsa-miR-21-3p	KIAA0226
hsa-miR-21-3p	LIN7C
hsa-miR-21-3p	ZC3H12C
hsa-miR-21-3p	MTA2
hsa-miR-21-3p	GPM6A
hsa-miR-21-3p	POU4F2
hsa-miR-21-3p	PDIA4
hsa-miR-21-3p	TIAM1
hsa-miR-21-3p	APPL1
hsa-miR-21-3p	ZYG11B
hsa-miR-21-3p	KIAA1524
hsa-miR-21-3p	WDR82
hsa-miR-21-3p	GRIA2
hsa-miR-21-3p	NAA15
hsa-miR-21-3p	DEFA4
hsa-miR-21-3p	CLEC7A
hsa-miR-21-3p	TSC1
hsa-miR-21-3p	B4GALT6
hsa-miR-21-3p	MYOZ2
hsa-miR-21-3p	PCDHA10
hsa-miR-21-3p	YWHAG
hsa-miR-21-3p	TMOD3
hsa-miR-21-3p	GABRB3
hsa-miR-21-3p	PDP2
hsa-miR-21-3p	ABRA
hsa-miR-21-3p	YOD1
hsa-miR-21-3p	MAP7D3
hsa-miR-21-3p	AP3S1
hsa-miR-21-3p	NCAM1
hsa-miR-21-3p	RNF168
hsa-miR-21-3p	C2ORF69
hsa-miR-21-3p	RBPMS
hsa-miR-21-3p	COL19A1
hsa-miR-21-3p	NAP1L5
hsa-miR-21-3p	ATP11B
hsa-miR-21-3p	DIRAS1
hsa-miR-21-3p	RNF128
hsa-miR-21-3p	MAGEB18
hsa-miR-21-3p	ASB4
hsa-miR-21-3p	ZFP42
hsa-miR-21-3p	GRID1
hsa-miR-21-3p	SS18L1
hsa-miR-21-3p	C2CD3
hsa-miR-21-3p	TMLHE
hsa-miR-21-3p	DCUN1D4
hsa-miR-21-3p	PPP1CC
hsa-miR-21-3p	PCGF5
hsa-miR-21-3p	SCAI
hsa-miR-21-3p	MFSD11
hsa-miR-21-3p	DYRK1A
hsa-miR-21-3p	RTN3
hsa-miR-21-3p	ELMO1
hsa-miR-21-3p	SSX2IP
hsa-miR-21-3p	SEMA6A
hsa-miR-21-3p	TBX5
hsa-miR-21-3p	USP4
hsa-miR-21-3p	TAP1
hsa-miR-21-3p	NFAT5
hsa-miR-21-3p	ATRNL1
hsa-miR-21-3p	ACAD11
hsa-miR-21-3p	PLGLB1
hsa-miR-21-3p	RNF146
hsa-miR-21-3p	ELK4
hsa-miR-21-3p	WDR37
hsa-miR-21-3p	HSD17B11
hsa-miR-21-3p	SPATS2L
hsa-miR-21-3p	PLGLB2
hsa-miR-21-3p	SEZ6
hsa-miR-21-3p	TOPORS
hsa-miR-21-3p	PAX9
hsa-miR-21-3p	CLIP1
hsa-miR-21-3p	ZNF652
hsa-miR-21-3p	UCHL5
hsa-miR-21-3p	ATP1B1
hsa-miR-21-3p	AMD1
hsa-miR-21-3p	MAP3K7
hsa-miR-21-3p	SORCS1
hsa-miR-21-3p	MYO6
hsa-miR-21-3p	FNBP1L
hsa-miR-21-3p	DR1
hsa-miR-21-3p	MTF2
hsa-miR-21-3p	ZNF326
hsa-miR-21-3p	DNAJB4
hsa-miR-21-3p	PDE4B
hsa-miR-21-3p	OCRL
hsa-miR-21-3p	HOOK1
hsa-miR-21-3p	ZNF217
hsa-miR-21-3p	MMRN2
hsa-miR-21-3p	TMEM164
hsa-miR-21-3p	NRG3
hsa-miR-21-3p	POLR3A
hsa-miR-21-3p	SAR1A
hsa-miR-21-3p	CHIC1
hsa-miR-21-3p	PHYHIPL
hsa-miR-21-3p	TRIM32
hsa-miR-21-3p	PRKG1
hsa-miR-21-3p	PDIK1L
hsa-miR-21-3p	NCOA6
hsa-miR-21-3p	RRAGB
hsa-miR-21-3p	PHF2
hsa-miR-21-3p	SHC3
hsa-miR-21-3p	C9ORF47
hsa-miR-21-3p	FGF14
hsa-miR-21-3p	TXNRD1
hsa-miR-21-3p	YPEL5
hsa-miR-21-3p	KIN
hsa-miR-21-3p	SLC35B3
hsa-miR-21-3p	TRIM22
hsa-miR-21-3p	CDK14
hsa-miR-21-3p	RIPK1
hsa-miR-21-3p	GCOM1
hsa-miR-21-3p	FRMPD4
hsa-miR-21-3p	ARHGAP6
hsa-miR-21-3p	NLGN4X
hsa-miR-21-3p	CCP110
hsa-miR-21-3p	SEC14L4
hsa-miR-21-3p	FAM83H
hsa-miR-21-3p	STK38L
hsa-miR-21-3p	LYST
hsa-miR-21-3p	SRSF2
hsa-miR-21-3p	USP45
hsa-miR-21-3p	ZNF800
hsa-miR-21-3p	SPOP
hsa-miR-21-3p	PPP6R3
hsa-miR-21-3p	USP49
hsa-miR-21-3p	PPM1A
hsa-miR-21-3p	OR10W1
hsa-miR-21-3p	CELF1
hsa-miR-21-3p	ZNF248
hsa-miR-21-3p	MLC1
hsa-miR-21-3p	PCDHA12
hsa-miR-21-3p	PCDHA11
hsa-miR-21-3p	C21ORF91
hsa-miR-21-3p	DUSP18
hsa-miR-21-3p	PARD3B
hsa-miR-21-3p	LITAF
hsa-miR-21-3p	ADTRP
hsa-miR-21-3p	FAM135A
hsa-miR-21-3p	STRAP
hsa-miR-21-3p	NXPE3
hsa-miR-21-3p	PEG3
hsa-miR-21-3p	RHD
hsa-miR-21-3p	ETV1
hsa-miR-21-3p	PPT1
hsa-miR-21-3p	ICOS
hsa-miR-21-3p	DISC1
hsa-miR-21-3p	CTDSPL
hsa-miR-21-3p	SMG1
hsa-miR-21-3p	MYSM1
hsa-miR-21-3p	EIF5A2
hsa-miR-21-3p	RYBP
hsa-miR-21-3p	ETF1
hsa-miR-21-3p	ATG12
hsa-miR-21-3p	PCDHA1
hsa-miR-21-3p	ZNF608
hsa-miR-21-3p	DDX4
hsa-miR-21-3p	SERINC5
hsa-miR-21-3p	CAMLG
hsa-miR-21-3p	KCNK9
hsa-miR-21-3p	UBR5
hsa-miR-21-3p	TRIQK
hsa-miR-21-3p	PCDHA3
hsa-miR-21-3p	GFRA2
hsa-miR-21-3p	KIRREL3
hsa-miR-21-3p	PCDHA7
hsa-miR-21-3p	PCDHA2
hsa-miR-21-3p	PCDHA6
hsa-miR-21-3p	PCDHA5
hsa-miR-21-3p	BCLAF1
hsa-miR-21-3p	PCDHA9
hsa-miR-21-3p	AIFM1
hsa-miR-21-3p	SCAMP1
hsa-miR-21-3p	HAL
hsa-miR-21-3p	CDK17
hsa-miR-21-3p	BCKDHB
hsa-miR-21-3p	TET2
hsa-miR-21-3p	MON2
hsa-miR-21-3p	PPFIA2
hsa-miR-21-3p	MAP3K9
hsa-miR-21-3p	KIAA0101
hsa-miR-21-3p	C18ORF42
hsa-miR-21-3p	KLK11
hsa-miR-21-3p	DCP1A
hsa-miR-196a-5p	HOXC8
hsa-miR-196a-5p	SULT2A1
hsa-miR-196a-5p	HOXA5
hsa-miR-196a-5p	TSPAN12
hsa-miR-196a-5p	CCDC47
hsa-miR-196a-5p	CREBL2
hsa-miR-196a-5p	CDKN1B
hsa-miR-196a-5p	GGCX
hsa-miR-196a-5p	HOXB7
hsa-miR-196a-5p	HOXA7
hsa-miR-196a-5p	LRRC17
hsa-miR-196a-5p	ZCCHC9
hsa-miR-196a-5p	DCAF15
hsa-miR-196a-5p	NEDD4L
hsa-miR-196a-5p	PDGFRA
hsa-miR-196a-5p	IGF2BP3
hsa-miR-196a-5p	PDCL
hsa-miR-196a-5p	SDCBP
hsa-miR-196a-5p	DYNC2LI1
hsa-miR-196a-5p	GALC
hsa-miR-196a-5p	PSMD11
hsa-miR-196a-5p	EEF2K
hsa-miR-196a-5p	MAP4K3
hsa-miR-196a-5p	DNAJC10
hsa-miR-196a-5p	MGAT4A
hsa-miR-196a-5p	CCNJ
hsa-miR-196a-5p	GATA6
hsa-miR-196a-5p	RPS27A
hsa-miR-196a-5p	ERLIN2
hsa-miR-196a-5p	UHRF2
hsa-miR-196a-5p	ABCB9
hsa-miR-196a-5p	GUF1
hsa-miR-196a-5p	C18ORF25
hsa-miR-196a-5p	RANBP2
hsa-miR-196a-5p	OTUD6B
hsa-miR-196a-5p	BACH1
hsa-miR-196a-5p	B3GNT7
hsa-miR-196a-5p	ABI2
hsa-miR-196a-5p	COL1A2
hsa-miR-196a-5p	HDX
hsa-miR-196a-5p	A2ML1
hsa-miR-196a-5p	COL3A1
hsa-miR-196a-5p	P2RY1
hsa-miR-196a-5p	FNIP1
hsa-miR-196a-5p	PTGR1
hsa-miR-196a-5p	RASGRP1
hsa-miR-196a-5p	ING5
hsa-miR-196a-5p	YOD1
hsa-miR-196a-5p	NOSTRIN
hsa-miR-196a-5p	SLC25A5
hsa-miR-196a-5p	DIP2A
hsa-miR-196a-5p	SYT9
hsa-miR-196a-5p	EEA1
hsa-miR-196a-5p	ELMOD2
hsa-miR-196a-5p	GDNF
hsa-miR-196a-5p	CBFA2T3
hsa-miR-196a-5p	GRPEL2
hsa-miR-196a-5p	RBM8A
hsa-miR-196a-5p	RLIM
hsa-miR-196a-5p	PRELID2
hsa-miR-196a-5p	ELF4
hsa-miR-196a-5p	EPHA3
hsa-miR-196a-5p	IQCJ-SCHIP1
hsa-miR-196a-5p	FAM154B
hsa-miR-196a-5p	GJB4
hsa-miR-196a-5p	RIOK3
hsa-miR-196a-5p	ACER2
hsa-miR-196a-5p	PLD1
hsa-miR-196a-5p	PBX3
hsa-miR-196a-5p	RDX
hsa-miR-196a-5p	NTN4
hsa-miR-196a-5p	FGD6
hsa-miR-196a-5p	OR7D2
hsa-miR-196a-5p	MBNL2
hsa-miR-196a-5p	HMGA1
hsa-miR-196a-5p	DOC2A
hsa-miR-196a-5p	GGA3
hsa-miR-196a-5p	FAS
hsa-miR-196a-5p	IGDCC4
hsa-miR-196a-5p	ZNF512
hsa-miR-196a-5p	RET
hsa-miR-196a-5p	SUOX
hsa-miR-196a-5p	CALM1
hsa-miR-196a-5p	RICTOR
hsa-miR-196a-5p	PLN
hsa-miR-196a-5p	WDR37
hsa-miR-196a-5p	FAM19A5
hsa-miR-196a-5p	IQCH
hsa-miR-196a-5p	EXOC8
hsa-miR-196a-5p	SCYL2
hsa-miR-196a-5p	LRIG2
hsa-miR-196a-5p	CALD1
hsa-miR-196a-5p	GPRASP1
hsa-miR-196a-5p	SCCPDH
hsa-miR-196a-5p	PPP1R15B
hsa-miR-196a-5p	TRMT1L
hsa-miR-196a-5p	CEP350
hsa-miR-196a-5p	DNM3
hsa-miR-196a-5p	VAX1
hsa-miR-196a-5p	EPHA7
hsa-miR-196a-5p	LIX1L
hsa-miR-196a-5p	KCNQ5
hsa-miR-196a-5p	COL24A1
hsa-miR-196a-5p	SLC9A6
hsa-miR-196a-5p	RAVER2
hsa-miR-196a-5p	LCOR
hsa-miR-196a-5p	HOOK1
hsa-miR-196a-5p	PARD6B
hsa-miR-196a-5p	ELAVL4
hsa-miR-196a-5p	SPATA6
hsa-miR-196a-5p	KLHL4
hsa-miR-196a-5p	FAM13C
hsa-miR-196a-5p	PRKG1
hsa-miR-196a-5p	MAPK8
hsa-miR-196a-5p	HABP4
hsa-miR-196a-5p	RCC2
hsa-miR-196a-5p	DIS3
hsa-miR-196a-5p	DCDC2
hsa-miR-196a-5p	LRP4
hsa-miR-196a-5p	GPCPD1
hsa-miR-196a-5p	LRIG3
hsa-miR-196a-5p	C9ORF72
hsa-miR-196a-5p	ZDHHC21
hsa-miR-196a-5p	ZMYND11
hsa-miR-196a-5p	PPAPDC2
hsa-miR-196a-5p	ZCCHC3
hsa-miR-196a-5p	AQP4
hsa-miR-196a-5p	OPA1
hsa-miR-196a-5p	GTDC1
hsa-miR-196a-5p	TRMT10A
hsa-miR-196a-5p	HOXA9
hsa-miR-196a-5p	POLR3D
hsa-miR-196a-5p	RBM12B
hsa-miR-196a-5p	KDM5A
hsa-miR-196a-5p	ROCK1
hsa-miR-196a-5p	MTRNR2L4
hsa-miR-196a-5p	HADH
hsa-miR-196a-5p	HMGA2
hsa-miR-196a-5p	VSNL1
hsa-miR-196a-5p	ZNF385B
hsa-miR-196a-5p	BRAP
hsa-miR-196a-5p	PBX1
hsa-miR-196a-5p	BIRC6
hsa-miR-196a-5p	NR2C2
hsa-miR-196a-5p	TTC26
hsa-miR-196a-5p	KIAA1429
hsa-miR-196a-5p	SRRT
hsa-miR-196a-5p	YIPF6
hsa-miR-196a-5p	RPL35A
hsa-miR-196a-5p	MYSM1
hsa-miR-196a-5p	PTPRG
hsa-miR-196a-5p	HOXB6
hsa-miR-196a-5p	NR6A1
hsa-miR-196a-5p	PANK2
hsa-miR-196a-5p	RGL2
hsa-miR-196a-5p	PACRGL
hsa-miR-196a-5p	TMEM161B
hsa-miR-196a-5p	SNX24
hsa-miR-196a-5p	RSPO2
hsa-miR-196a-5p	SNAP91
hsa-miR-196a-5p	TRERF1
hsa-miR-196a-5p	DICER1
hsa-miR-196a-5p	GCFC2
hsa-miR-196a-5p	ZNF268
hsa-miR-196a-5p	GTF2A1
hsa-miR-196a-5p	SLC35F4
hsa-miR-196a-5p	FAM104A
hsa-miR-196a-5p	ZNF850
hsa-miR-196a-5p	ZNF473
hsa-miR-196a-5p	LRRC4B
hsa-miR-9-5p	M6PR
hsa-miR-9-5p	PDK4
hsa-miR-9-5p	SLC39A9
hsa-miR-9-5p	VAMP3
hsa-miR-9-5p	CDK13
hsa-miR-9-5p	SIRT1
hsa-miR-9-5p	ASPHD2
hsa-miR-9-5p	RASD2
hsa-miR-9-5p	CBX7
hsa-miR-9-5p	NID2
hsa-miR-9-5p	GNPNAT1
hsa-miR-9-5p	SPTLC2
hsa-miR-9-5p	SIX4
hsa-miR-9-5p	ZNF263
hsa-miR-9-5p	MGA
hsa-miR-9-5p	EHD4
hsa-miR-9-5p	NFKB1
hsa-miR-9-5p	TMEM109
hsa-miR-9-5p	C11ORF58
hsa-miR-9-5p	KITLG
hsa-miR-9-5p	KCTD10
hsa-miR-9-5p	HCFC2
hsa-miR-9-5p	RARS
hsa-miR-9-5p	KLHL18
hsa-miR-9-5p	LEPRE1
hsa-miR-9-5p	SLC19A2
hsa-miR-9-5p	TBPL1
hsa-miR-9-5p	NEK9
hsa-miR-9-5p	RHOQ
hsa-miR-9-5p	YIPF4
hsa-miR-9-5p	FYTTD1
hsa-miR-9-5p	KCNJ2
hsa-miR-9-5p	ATG14
hsa-miR-9-5p	HN1L
hsa-miR-9-5p	NCAPG
hsa-miR-9-5p	FAM155B
hsa-miR-9-5p	PXDN
hsa-miR-9-5p	C19ORF66
hsa-miR-9-5p	GRWD1
hsa-miR-9-5p	GRSF1
hsa-miR-9-5p	AP3B1
hsa-miR-9-5p	ZBED3
hsa-miR-9-5p	TMTC1
hsa-miR-9-5p	LYVE1
hsa-miR-9-5p	SORT1
hsa-miR-9-5p	IGF2BP3
hsa-miR-9-5p	SLC31A2
hsa-miR-9-5p	PI15
hsa-miR-9-5p	TIMM23
hsa-miR-9-5p	LHX5
hsa-miR-9-5p	ANKRD13A
hsa-miR-9-5p	PDGFRB
hsa-miR-9-5p	AP4E1
hsa-miR-9-5p	FAF2
hsa-miR-9-5p	SPAG9
hsa-miR-9-5p	ATF1
hsa-miR-9-5p	ANKRD12
hsa-miR-9-5p	SLC4A1
hsa-miR-9-5p	SMURF2
hsa-miR-9-5p	FBN2
hsa-miR-9-5p	TTPAL
hsa-miR-9-5p	AMMECR1
hsa-miR-9-5p	ARPC1A
hsa-miR-9-5p	CCDC6
hsa-miR-9-5p	CAPZA1
hsa-miR-9-5p	PALMD
hsa-miR-9-5p	ACTR3
hsa-miR-9-5p	ITPKC
hsa-miR-9-5p	CNTN3
hsa-miR-9-5p	SLC9A1
hsa-miR-9-5p	GSK3B
hsa-miR-9-5p	FNIP2
hsa-miR-9-5p	SHC2
hsa-miR-9-5p	XRN1
hsa-miR-9-5p	GOLPH3
hsa-miR-9-5p	VCAN
hsa-miR-9-5p	ENPEP
hsa-miR-9-5p	CDC14B
hsa-miR-9-5p	PRKAR2B
hsa-miR-9-5p	PIK3C2A
hsa-miR-9-5p	AEBP2
hsa-miR-9-5p	MESDC1
hsa-miR-9-5p	FURIN
hsa-miR-9-5p	IQGAP1
hsa-miR-9-5p	ARHGDIA
hsa-miR-9-5p	TTYH2
hsa-miR-9-5p	KCNH1
hsa-miR-9-5p	VGLL4
hsa-miR-9-5p	2018-03-06
hsa-miR-9-5p	RAB19
hsa-miR-9-5p	BTBD10
hsa-miR-9-5p	MYRF
hsa-miR-9-5p	ORAOV1
hsa-miR-9-5p	YBX3
hsa-miR-9-5p	FREM2
hsa-miR-9-5p	CRIM1
hsa-miR-9-5p	PLBD2
hsa-miR-9-5p	SETBP1
hsa-miR-9-5p	C18ORF25
hsa-miR-9-5p	SLC30A6
hsa-miR-9-5p	GGPS1
hsa-miR-9-5p	RMND5A
hsa-miR-9-5p	ERBB2IP
hsa-miR-9-5p	UBASH3B
hsa-miR-9-5p	DKK2
hsa-miR-9-5p	AKR1B1
hsa-miR-9-5p	BAG4
hsa-miR-9-5p	SLCO2B1
hsa-miR-9-5p	STC1
hsa-miR-9-5p	HOXB13
hsa-miR-9-5p	CCNT2
hsa-miR-9-5p	FZD5
hsa-miR-9-5p	FAM19A4
hsa-miR-9-5p	FSTL1
hsa-miR-9-5p	ADAMTS9
hsa-miR-9-5p	PCNP
hsa-miR-9-5p	SNIP1
hsa-miR-9-5p	MAP1B
hsa-miR-9-5p	TNFRSF21
hsa-miR-9-5p	MDGA1
hsa-miR-9-5p	ARF6
hsa-miR-9-5p	LRRK2
hsa-miR-9-5p	IDH3A
hsa-miR-9-5p	RNF169
hsa-miR-9-5p	ZNF407
hsa-miR-9-5p	CCNDBP1
hsa-miR-9-5p	MCC
hsa-miR-9-5p	C2ORF15
hsa-miR-9-5p	EMB
hsa-miR-9-5p	HIPK3
hsa-miR-9-5p	MAEA
hsa-miR-9-5p	ALCAM
hsa-miR-9-5p	SNX7
hsa-miR-9-5p	SOCS5
hsa-miR-9-5p	CXCL11
hsa-miR-9-5p	GTPBP2
hsa-miR-9-5p	PDCD6IP
hsa-miR-9-5p	THAP2
hsa-miR-9-5p	CLOCK
hsa-miR-9-5p	SP3
hsa-miR-9-5p	AGFG1
hsa-miR-9-5p	PEAK1
hsa-miR-9-5p	YPEL2
hsa-miR-9-5p	SPECC1L
hsa-miR-9-5p	AMBRA1
hsa-miR-9-5p	TRIM55
hsa-miR-9-5p	FBN1
hsa-miR-9-5p	OXTR
hsa-miR-9-5p	EDEM3
hsa-miR-9-5p	FOXP1
hsa-miR-9-5p	MLXIP
hsa-miR-9-5p	WDTC1
hsa-miR-9-5p	SHISA2
hsa-miR-9-5p	MRI1
hsa-miR-9-5p	ZDHHC20
hsa-miR-9-5p	ANO6
hsa-miR-9-5p	RNF144A
hsa-miR-9-5p	GPR137C
hsa-miR-9-5p	SLC14A1
hsa-miR-9-5p	KCTD2
hsa-miR-9-5p	UACA
hsa-miR-9-5p	MRE11A
hsa-miR-9-5p	ZKSCAN1
hsa-miR-9-5p	RNF128
hsa-miR-9-5p	DIAPH2
hsa-miR-9-5p	ARID1A
hsa-miR-9-5p	GTPBP3
hsa-miR-9-5p	ANGPT2
hsa-miR-9-5p	C1ORF173
hsa-miR-9-5p	PSD3
hsa-miR-9-5p	GOLGA8R
hsa-miR-9-5p	POU3F2
hsa-miR-9-5p	LZTS3
hsa-miR-9-5p	AP1S2
hsa-miR-9-5p	C16ORF54
hsa-miR-9-5p	NFATC3
hsa-miR-9-5p	ARMCX2
hsa-miR-9-5p	CTHRC1
hsa-miR-9-5p	RTN4RL1
hsa-miR-9-5p	LAMP1
hsa-miR-9-5p	ASB7
hsa-miR-9-5p	RFX6
hsa-miR-9-5p	REEP4
hsa-miR-9-5p	DCUN1D4
hsa-miR-9-5p	ENTPD5
hsa-miR-9-5p	ZNF354A
hsa-miR-9-5p	CRISP1
hsa-miR-9-5p	RNF24
hsa-miR-9-5p	PCGF5
hsa-miR-9-5p	HLCS
hsa-miR-9-5p	FNDC3B
hsa-miR-9-5p	CCDC88A
hsa-miR-9-5p	STARD13
hsa-miR-9-5p	PCGF6
hsa-miR-9-5p	RHOBTB1
hsa-miR-9-5p	PHF8
hsa-miR-9-5p	NEDD4
hsa-miR-9-5p	DYRK1A
hsa-miR-9-5p	TNC
hsa-miR-9-5p	MEF2C
hsa-miR-9-5p	FOXN2
hsa-miR-9-5p	CCNG1
hsa-miR-9-5p	GOLGA8J
hsa-miR-9-5p	SLC20A2
hsa-miR-9-5p	ASCL4
hsa-miR-9-5p	INSIG1
hsa-miR-9-5p	RAP2C
hsa-miR-9-5p	UBE4B
hsa-miR-9-5p	ICMT
hsa-miR-9-5p	ZNF395
hsa-miR-9-5p	LIN28B
hsa-miR-9-5p	ARID1B
hsa-miR-9-5p	ARID3B
hsa-miR-9-5p	MTMR2
hsa-miR-9-5p	PCSK6
hsa-miR-9-5p	UBE3C
hsa-miR-9-5p	RNF111
hsa-miR-9-5p	CALB2
hsa-miR-9-5p	PTBP1
hsa-miR-9-5p	C7ORF25
hsa-miR-9-5p	SPATA16
hsa-miR-9-5p	SNX16
hsa-miR-9-5p	IPO4
hsa-miR-9-5p	MAP7
hsa-miR-9-5p	ELOVL2
hsa-miR-9-5p	ANO1
hsa-miR-9-5p	VANGL1
hsa-miR-9-5p	FBXL3
hsa-miR-9-5p	FNBP1
hsa-miR-9-5p	FBRS
hsa-miR-9-5p	SMOC2
hsa-miR-9-5p	PBRM1
hsa-miR-9-5p	SCRIB
hsa-miR-9-5p	ZBTB14
hsa-miR-9-5p	ANK2
hsa-miR-9-5p	MUM1L1
hsa-miR-9-5p	COL9A1
hsa-miR-9-5p	SYNJ1
hsa-miR-9-5p	DNAJC14
hsa-miR-9-5p	MAGT1
hsa-miR-9-5p	FAM19A5
hsa-miR-9-5p	FAM73B
hsa-miR-9-5p	MYPN
hsa-miR-9-5p	TGFBR2
hsa-miR-9-5p	MYO1C
hsa-miR-9-5p	MCMBP
hsa-miR-9-5p	COL4A2
hsa-miR-9-5p	EPHB4
hsa-miR-9-5p	UBE2Z
hsa-miR-9-5p	MAP3K3
hsa-miR-9-5p	TSC22D2
hsa-miR-9-5p	KIF21A
hsa-miR-9-5p	NID1
hsa-miR-9-5p	B3GALNT2
hsa-miR-9-5p	TMEM63A
hsa-miR-9-5p	TULP4
hsa-miR-9-5p	FAM72A
hsa-miR-9-5p	DSTYK
hsa-miR-9-5p	NR5A2
hsa-miR-9-5p	ZBTB41
hsa-miR-9-5p	PRRX1
hsa-miR-9-5p	SCYL3
hsa-miR-9-5p	ATP1B1
hsa-miR-9-5p	PIGM
hsa-miR-9-5p	THEMIS
hsa-miR-9-5p	ARHGEF2
hsa-miR-9-5p	SLC50A1
hsa-miR-9-5p	SHC1
hsa-miR-9-5p	PYGO2
hsa-miR-9-5p	ATP8B2
hsa-miR-9-5p	FLG
hsa-miR-9-5p	IKZF5
hsa-miR-9-5p	SEC23IP
hsa-miR-9-5p	PRDM1
hsa-miR-9-5p	OTUD7B
hsa-miR-9-5p	FAM72C
hsa-miR-9-5p	FAM46C
hsa-miR-9-5p	HIPK1
hsa-miR-9-5p	SLC10A3
hsa-miR-9-5p	FAM46A
hsa-miR-9-5p	ELOVL4
hsa-miR-9-5p	CNNM2
hsa-miR-9-5p	SFXN2
hsa-miR-9-5p	VAV3
hsa-miR-9-5p	GMEB2
hsa-miR-9-5p	LRRC39
hsa-miR-9-5p	DR1
hsa-miR-9-5p	LRRC8C
hsa-miR-9-5p	GOT1
hsa-miR-9-5p	PI4K2A
hsa-miR-9-5p	SLC44A5
hsa-miR-9-5p	TENM1
hsa-miR-9-5p	CUL4B
hsa-miR-9-5p	NFATC2
hsa-miR-9-5p	CC2D1B
hsa-miR-9-5p	ARFGEF2
hsa-miR-9-5p	TESK2
hsa-miR-9-5p	FOXP4
hsa-miR-9-5p	ZC3H12A
hsa-miR-9-5p	GRIK3
hsa-miR-9-5p	DENND1A
hsa-miR-9-5p	REEP3
hsa-miR-9-5p	FAM13C
hsa-miR-9-5p	BICC1
hsa-miR-9-5p	OGDHL
hsa-miR-9-5p	PTBP3
hsa-miR-9-5p	LDLRAP1
hsa-miR-9-5p	AWAT1
hsa-miR-9-5p	COL15A1
hsa-miR-9-5p	OTUD3
hsa-miR-9-5p	C9ORF89
hsa-miR-9-5p	ASXL1
hsa-miR-9-5p	AUH
hsa-miR-9-5p	SHROOM4
hsa-miR-9-5p	ABI1
hsa-miR-9-5p	KIAA2013
hsa-miR-9-5p	GATA1
hsa-miR-9-5p	TBC1D8
hsa-miR-9-5p	NAPB
hsa-miR-9-5p	PTAR1
hsa-miR-9-5p	TGOLN2
hsa-miR-9-5p	DTD1
hsa-miR-9-5p	KCTD12
hsa-miR-9-5p	TNFRSF9
hsa-miR-9-5p	STAM
hsa-miR-9-5p	KLF5
hsa-miR-9-5p	SMARCE1
hsa-miR-9-5p	PCSK2
hsa-miR-9-5p	PCDH17
hsa-miR-9-5p	FLRT3
hsa-miR-9-5p	CEP104
hsa-miR-9-5p	FAM107B
hsa-miR-9-5p	ITM2B
hsa-miR-9-5p	OPTN
hsa-miR-9-5p	KIF13A
hsa-miR-9-5p	ATL2
hsa-miR-9-5p	C4ORF46
hsa-miR-9-5p	PTCHD1
hsa-miR-9-5p	LHFP
hsa-miR-9-5p	SLC35B3
hsa-miR-9-5p	SYAP1
hsa-miR-9-5p	FRY
hsa-miR-9-5p	PRPS2
hsa-miR-9-5p	UBL3
hsa-miR-9-5p	FREM1
hsa-miR-9-5p	SHROOM2
hsa-miR-9-5p	ZDHHC21
hsa-miR-9-5p	PDX1
hsa-miR-9-5p	IGFBP3
hsa-miR-9-5p	MIER3
hsa-miR-9-5p	SLC39A14
hsa-miR-9-5p	IL33
hsa-miR-9-5p	ITPRIPL2
hsa-miR-9-5p	GREB1
hsa-miR-9-5p	PPAPDC2
hsa-miR-9-5p	RFX3
hsa-miR-9-5p	MAP1A
hsa-miR-9-5p	IGF2BP2
hsa-miR-9-5p	FGF9
hsa-miR-9-5p	FOXG1
hsa-miR-9-5p	ZCWPW2
hsa-miR-9-5p	SRGAP3
hsa-miR-9-5p	NIN
hsa-miR-9-5p	KCNJ14
hsa-miR-9-5p	GALNT3
hsa-miR-9-5p	PDGFD
hsa-miR-9-5p	CBX1
hsa-miR-9-5p	HMMR
hsa-miR-9-5p	GABRB2
hsa-miR-9-5p	ESYT1
hsa-miR-9-5p	MTHFD2
hsa-miR-9-5p	SGMS2
hsa-miR-9-5p	ZBTB1
hsa-miR-9-5p	SIN3A
hsa-miR-9-5p	ARHGAP24
hsa-miR-9-5p	WDR6
hsa-miR-9-5p	ULK2
hsa-miR-9-5p	PRKG2
hsa-miR-9-5p	FRMD6
hsa-miR-9-5p	PMP22
hsa-miR-9-5p	ZNF501
hsa-miR-9-5p	HPS5
hsa-miR-9-5p	HNF4G
hsa-miR-9-5p	KIAA1217
hsa-miR-9-5p	CACNB2
hsa-miR-9-5p	RBMS3
hsa-miR-9-5p	DDHD2
hsa-miR-9-5p	MAP2K7
hsa-miR-9-5p	ADAM22
hsa-miR-9-5p	MPP3
hsa-miR-9-5p	STK32A
hsa-miR-9-5p	CLDN14
hsa-miR-9-5p	MAP3K1
hsa-miR-9-5p	HIC1
hsa-miR-9-5p	SGSM1
hsa-miR-9-5p	C21ORF91
hsa-miR-9-5p	KLHDC7A
hsa-miR-9-5p	P4HA2
hsa-miR-9-5p	PARG
hsa-miR-9-5p	SACS
hsa-miR-9-5p	DGKB
hsa-miR-9-5p	GRHL1
hsa-miR-9-5p	SLC8A1
hsa-miR-9-5p	HIC2
hsa-miR-9-5p	ELAVL1
hsa-miR-9-5p	PRDM6
hsa-miR-9-5p	FOXP2
hsa-miR-9-5p	EDAR
hsa-miR-9-5p	DYNC1I2
hsa-miR-9-5p	STEAP3
hsa-miR-9-5p	CXCR4
hsa-miR-9-5p	CPEB3
hsa-miR-9-5p	PIGZ
hsa-miR-9-5p	CCDC138
hsa-miR-9-5p	BAHD1
hsa-miR-9-5p	PHTF2
hsa-miR-9-5p	FAM126B
hsa-miR-9-5p	STK3
hsa-miR-9-5p	NXPE3
hsa-miR-9-5p	SLC25A12
hsa-miR-9-5p	RFX7
hsa-miR-9-5p	KIAA0040
hsa-miR-9-5p	PPP1R13B
hsa-miR-9-5p	FKBP7
hsa-miR-9-5p	MYOCD
hsa-miR-9-5p	MDGA2
hsa-miR-9-5p	NHSL1
hsa-miR-9-5p	CNTN4
hsa-miR-9-5p	SNRK
hsa-miR-9-5p	PHLDB2
hsa-miR-9-5p	TMCC1
hsa-miR-9-5p	KCNMB2
hsa-miR-9-5p	DLX3
hsa-miR-9-5p	DIO2
hsa-miR-9-5p	SPG20
hsa-miR-9-5p	KIAA1549
hsa-miR-9-5p	C3ORF58
hsa-miR-9-5p	TGFBI
hsa-miR-9-5p	RAB34
hsa-miR-9-5p	SMARCD2
hsa-miR-9-5p	LECT1
hsa-miR-9-5p	USP53
hsa-miR-9-5p	EIF4E
hsa-miR-9-5p	DSE
hsa-miR-9-5p	TRA2B
hsa-miR-9-5p	CSGALNACT1
hsa-miR-9-5p	SLC6A6
hsa-miR-9-5p	SYT1
hsa-miR-9-5p	SCUBE2
hsa-miR-9-5p	IKZF2
hsa-miR-9-5p	CCDC43
hsa-miR-9-5p	TINAGL1
hsa-miR-9-5p	TYW3
hsa-miR-9-5p	MME
hsa-miR-9-5p	ADCY5
hsa-miR-9-5p	HLTF
hsa-miR-9-5p	IL12A
hsa-miR-9-5p	ZEB2
hsa-miR-9-5p	SSR3
hsa-miR-9-5p	ATF2
hsa-miR-9-5p	ATP11A
hsa-miR-9-5p	ONECUT2
hsa-miR-9-5p	GCH1
hsa-miR-9-5p	PDGFC
hsa-miR-9-5p	FRYL
hsa-miR-9-5p	HMGXB3
hsa-miR-9-5p	CNOT6L
hsa-miR-9-5p	SNX25
hsa-miR-9-5p	ZNF131
hsa-miR-9-5p	GOLGA8O
hsa-miR-9-5p	GOLGA8K
hsa-miR-9-5p	SERINC5
hsa-miR-9-5p	ZBTB38
hsa-miR-9-5p	LHFPL2
hsa-miR-9-5p	RNF150
hsa-miR-9-5p	CTNNA1
hsa-miR-9-5p	RNF19A
hsa-miR-9-5p	DENND3
hsa-miR-9-5p	ZFAND1
hsa-miR-9-5p	RANBP17
hsa-miR-9-5p	FLI1
hsa-miR-9-5p	RPS6KA4
hsa-miR-9-5p	ECHDC1
hsa-miR-9-5p	ZNF185
hsa-miR-9-5p	ZNF324
hsa-miR-9-5p	CPEB2
hsa-miR-9-5p	FAM46D
hsa-miR-9-5p	UHMK1
hsa-miR-9-5p	TXNDC5
hsa-miR-9-5p	SMAP2
hsa-miR-9-5p	ZNF662
hsa-miR-9-5p	DICER1
hsa-miR-9-5p	RASSF3
hsa-miR-9-5p	DCTN2
hsa-miR-9-5p	TPK1
hsa-miR-9-5p	GSKIP
hsa-miR-9-5p	ZNF280D
hsa-miR-9-5p	TRAF3
hsa-miR-9-5p	ONECUT1
hsa-miR-9-5p	TRPM7
hsa-miR-9-5p	GOLGA8M
hsa-miR-9-5p	SLC25A24
hsa-miR-9-5p	GOLGA8H
hsa-miR-9-5p	C15ORF41
hsa-miR-9-5p	POLI
hsa-miR-9-5p	CYB561
hsa-miR-9-5p	DYRK1B
hsa-miR-9-5p	PAK4
hsa-miR-9-5p	DNAJC3
hsa-miR-9-5p	ACOT7
hsa-miR-99a-5p	MTMR3
hsa-miR-99a-5p	FGFR3
hsa-miR-99a-5p	MBNL1
hsa-miR-99a-5p	HS3ST3B1
hsa-miR-99a-5p	RAVER2
hsa-miR-99a-5p	BAZ2A
hsa-miR-99a-5p	ZNF845
hsa-miR-99a-5p	ETFDH
hsa-miR-99a-5p	PPP3CA
hsa-miR-99a-5p	TTC39A
hsa-miR-106b-5p	PSD
hsa-miR-106b-5p	RB1CC1
hsa-miR-106b-5p	IL1RAP
hsa-miR-106b-5p	LAPTM4A
hsa-miR-106b-5p	KLHL20
hsa-miR-106b-5p	JOSD1
hsa-miR-106b-5p	GOSR1
hsa-miR-106b-5p	TNFAIP1
hsa-miR-106b-5p	NRBP1
hsa-miR-106b-5p	NEK9
hsa-miR-106b-5p	PANK3
hsa-miR-106b-5p	TSHZ3
hsa-miR-106b-5p	SOX4
hsa-miR-106b-5p	IRF1
hsa-miR-106b-5p	MSTO1
hsa-miR-106b-5p	LAMP5
hsa-miR-106b-5p	ERI1
hsa-miR-106b-5p	ZNF236
hsa-miR-106b-5p	ZFYVE20
hsa-miR-106b-5p	NEDD4L
hsa-miR-106b-5p	PDGFRA
hsa-miR-106b-5p	DYNC1LI2
hsa-miR-106b-5p	STX6
hsa-miR-106b-5p	DIRC2
hsa-miR-106b-5p	ANKRD12
hsa-miR-106b-5p	CHD5
hsa-miR-106b-5p	SLC5A7
hsa-miR-106b-5p	POLQ
hsa-miR-106b-5p	RAPGEF2
hsa-miR-106b-5p	FNIP2
hsa-miR-106b-5p	AGA
hsa-miR-106b-5p	WBSCR22
hsa-miR-106b-5p	MAP3K12
hsa-miR-106b-5p	UBE2Q2
hsa-miR-106b-5p	SCAMP2
hsa-miR-106b-5p	CTSK
hsa-miR-106b-5p	SCRN3
hsa-miR-106b-5p	SUMF1
hsa-miR-106b-5p	RNF145
hsa-miR-106b-5p	PHIP
hsa-miR-106b-5p	CRIM1
hsa-miR-106b-5p	MYCN
hsa-miR-106b-5p	PPP1R21
hsa-miR-106b-5p	IGSF10
hsa-miR-106b-5p	UXS1
hsa-miR-106b-5p	ACPL2
hsa-miR-106b-5p	ARHGEF3
hsa-miR-106b-5p	FOXQ1
hsa-miR-106b-5p	WEE1
hsa-miR-106b-5p	CASC4
hsa-miR-106b-5p	SLC43A2
hsa-miR-106b-5p	PBK
hsa-miR-106b-5p	CSNK1G1
hsa-miR-106b-5p	ARAP2
hsa-miR-106b-5p	S1PR1
hsa-miR-106b-5p	PCDHA10
hsa-miR-106b-5p	FAM57A
hsa-miR-106b-5p	MAP3K11
hsa-miR-106b-5p	ARHGAP12
hsa-miR-106b-5p	ARHGAP1
hsa-miR-106b-5p	ZNF417
hsa-miR-106b-5p	TMEM168
hsa-miR-106b-5p	PITPNA
hsa-miR-106b-5p	ZHX2
hsa-miR-106b-5p	NEUROG1
hsa-miR-106b-5p	YOD1
hsa-miR-106b-5p	LASP1
hsa-miR-106b-5p	DIP2A
hsa-miR-106b-5p	C2ORF69
hsa-miR-106b-5p	PLEKHO2
hsa-miR-106b-5p	DCUN1D3
hsa-miR-106b-5p	HMGB3
hsa-miR-106b-5p	CEP57
hsa-miR-106b-5p	DCBLD2
hsa-miR-106b-5p	PSG3
hsa-miR-106b-5p	NR4A3
hsa-miR-106b-5p	BTBD7
hsa-miR-106b-5p	NPAS2
hsa-miR-106b-5p	ZNF202
hsa-miR-106b-5p	SNTB2
hsa-miR-106b-5p	SPTY2D1
hsa-miR-106b-5p	HIP1
hsa-miR-106b-5p	ZNF587
hsa-miR-106b-5p	DAB2
hsa-miR-106b-5p	SLC4A4
hsa-miR-106b-5p	ANKFY1
hsa-miR-106b-5p	JAK1
hsa-miR-106b-5p	ZNF107
hsa-miR-106b-5p	ARID4B
hsa-miR-106b-5p	CPNE1
hsa-miR-106b-5p	STYX
hsa-miR-106b-5p	SERF1A
hsa-miR-106b-5p	PIP4K2C
hsa-miR-106b-5p	SRGAP1
hsa-miR-106b-5p	BICD2
hsa-miR-106b-5p	TBC1D8B
hsa-miR-106b-5p	ZNF74
hsa-miR-106b-5p	FXR1
hsa-miR-106b-5p	ELK4
hsa-miR-106b-5p	TNKS1BP1
hsa-miR-106b-5p	SCN3A
hsa-miR-106b-5p	TMEM123
hsa-miR-106b-5p	ZSCAN20
hsa-miR-106b-5p	IPO9
hsa-miR-106b-5p	RUNDC1
hsa-miR-106b-5p	E2F2
hsa-miR-106b-5p	TGFB1I1
hsa-miR-106b-5p	SGMS1
hsa-miR-106b-5p	INO80
hsa-miR-106b-5p	KIF26B
hsa-miR-106b-5p	AKT3
hsa-miR-106b-5p	CEP170
hsa-miR-106b-5p	SLC35F3
hsa-miR-106b-5p	THBS2
hsa-miR-106b-5p	LPGAT1
hsa-miR-106b-5p	SLC41A1
hsa-miR-106b-5p	PPP1R15B
hsa-miR-106b-5p	B3GALT2
hsa-miR-106b-5p	SUCO
hsa-miR-106b-5p	PRRX1
hsa-miR-106b-5p	TCHH
hsa-miR-106b-5p	LACE1
hsa-miR-106b-5p	ATE1
hsa-miR-106b-5p	NEURL1B
hsa-miR-106b-5p	GBF1
hsa-miR-106b-5p	OLFM3
hsa-miR-106b-5p	DPYD
hsa-miR-106b-5p	TMEM56
hsa-miR-106b-5p	PKN2
hsa-miR-106b-5p	OCRL
hsa-miR-106b-5p	ZNF217
hsa-miR-106b-5p	FAM102A
hsa-miR-106b-5p	CHIC1
hsa-miR-106b-5p	TXLNA
hsa-miR-106b-5p	REEP3
hsa-miR-106b-5p	RPA2
hsa-miR-106b-5p	MAPK8
hsa-miR-106b-5p	RCAN3
hsa-miR-106b-5p	RASGEF1A
hsa-miR-106b-5p	PHF1
hsa-miR-106b-5p	ITCH
hsa-miR-106b-5p	TBC1D2
hsa-miR-106b-5p	ZNF367
hsa-miR-106b-5p	MAP3K8
hsa-miR-106b-5p	SCN2A
hsa-miR-106b-5p	WAC
hsa-miR-106b-5p	KIF3B
hsa-miR-106b-5p	ABI1
hsa-miR-106b-5p	TLE4
hsa-miR-106b-5p	MOG
hsa-miR-106b-5p	NRSN1
hsa-miR-106b-5p	PLCB1
hsa-miR-106b-5p	PFKFB3
hsa-miR-106b-5p	RBBP7
hsa-miR-106b-5p	USP3
hsa-miR-106b-5p	ZBTB4
hsa-miR-106b-5p	SERF1B
hsa-miR-106b-5p	HDHD1
hsa-miR-106b-5p	SMOC1
hsa-miR-106b-5p	LGI2
hsa-miR-106b-5p	ZMYM2
hsa-miR-106b-5p	CADM2
hsa-miR-106b-5p	UNKL
hsa-miR-106b-5p	LRP1B
hsa-miR-106b-5p	ARL4C
hsa-miR-106b-5p	MDM4
hsa-miR-106b-5p	CIT
hsa-miR-106b-5p	GTDC1
hsa-miR-106b-5p	PPP6R3
hsa-miR-106b-5p	SV2B
hsa-miR-106b-5p	AKTIP
hsa-miR-106b-5p	SFMBT1
hsa-miR-106b-5p	PCDH15
hsa-miR-106b-5p	PREX1
hsa-miR-106b-5p	MRGPRX3
hsa-miR-106b-5p	HMBOX1
hsa-miR-106b-5p	DUSP8
hsa-miR-106b-5p	PCDHA12
hsa-miR-106b-5p	PCDHA11
hsa-miR-106b-5p	UFD1L
hsa-miR-106b-5p	KIAA1522
hsa-miR-106b-5p	NDEL1
hsa-miR-106b-5p	PRDM6
hsa-miR-106b-5p	RAPGEF4
hsa-miR-106b-5p	NABP1
hsa-miR-106b-5p	DAZAP2
hsa-miR-106b-5p	BBX
hsa-miR-106b-5p	LIMK1
hsa-miR-106b-5p	FAM126B
hsa-miR-106b-5p	GNS
hsa-miR-106b-5p	ARHGEF28
hsa-miR-106b-5p	CNOT4
hsa-miR-106b-5p	PLEKHM1
hsa-miR-106b-5p	MYO19
hsa-miR-106b-5p	SSFA2
hsa-miR-106b-5p	CREB1
hsa-miR-106b-5p	ERAP1
hsa-miR-106b-5p	MAPK9
hsa-miR-106b-5p	KIF5A
hsa-miR-106b-5p	FGF5
hsa-miR-106b-5p	JRKL
hsa-miR-106b-5p	SKIL
hsa-miR-106b-5p	ACSL4
hsa-miR-106b-5p	EIF5A2
hsa-miR-106b-5p	FAM19A1
hsa-miR-106b-5p	FNDC3A
hsa-miR-106b-5p	LRRC55
hsa-miR-106b-5p	ANKRD50
hsa-miR-106b-5p	PCDHA1
hsa-miR-106b-5p	LYSMD3
hsa-miR-106b-5p	MAT2B
hsa-miR-106b-5p	PCDHA3
hsa-miR-106b-5p	YPEL4
hsa-miR-106b-5p	PCDHA7
hsa-miR-106b-5p	PCDHA2
hsa-miR-106b-5p	PAFAH1B2
hsa-miR-106b-5p	PCDHA6
hsa-miR-106b-5p	PCDHA5
hsa-miR-106b-5p	PCDHA9
hsa-miR-106b-5p	SYBU
hsa-miR-106b-5p	ARL13B
hsa-miR-106b-5p	SESN3
hsa-miR-106b-5p	TSPAN9
hsa-miR-106b-5p	ADARB1
hsa-miR-106b-5p	YTHDF3
hsa-miR-106b-5p	TMEM50B
hsa-miR-106b-5p	ITFG1
hsa-miR-106b-5p	MYNN
hsa-miR-106b-5p	SMAD5
hsa-miR-106b-5p	MAP3K9
hsa-miR-106b-5p	NAA30
hsa-miR-106b-5p	LDLR
hsa-miR-106b-5p	CHD9
hsa-miR-106b-5p	SALL1
hsa-miR-106b-5p	STAT3
hsa-miR-106b-5p	TMUB2
hsa-miR-106b-5p	ANKRD29
hsa-miR-106b-5p	MAPK4
hsa-miR-142-5p	RGPD5
hsa-miR-142-5p	KIAA2022
hsa-miR-142-5p	CBLN4
hsa-miR-142-5p	FAM168A
hsa-miR-142-5p	APPBP2
hsa-miR-142-5p	OXCT1
hsa-miR-142-5p	CCDC80
hsa-miR-142-5p	SIX4
hsa-miR-142-5p	ZFYVE21
hsa-miR-142-5p	STS
hsa-miR-142-5p	ATP1B4
hsa-miR-142-5p	USP10
hsa-miR-142-5p	TWISTNB
hsa-miR-142-5p	CAV2
hsa-miR-142-5p	C1GALT1
hsa-miR-142-5p	PHF17
hsa-miR-142-5p	KITLG
hsa-miR-142-5p	CD69
hsa-miR-142-5p	MYF5
hsa-miR-142-5p	KRR1
hsa-miR-142-5p	ZBTB24
hsa-miR-142-5p	TMEM30A
hsa-miR-142-5p	TRIM23
hsa-miR-142-5p	AADAC
hsa-miR-142-5p	TTL
hsa-miR-142-5p	MOB4
hsa-miR-142-5p	SLC9A2
hsa-miR-142-5p	PLEKHA3
hsa-miR-142-5p	DENND1B
hsa-miR-142-5p	FBXO30
hsa-miR-142-5p	MED28
hsa-miR-142-5p	RHOQ
hsa-miR-142-5p	LIPF
hsa-miR-142-5p	AHR
hsa-miR-142-5p	ZC3H13
hsa-miR-142-5p	SGPP1
hsa-miR-142-5p	EGLN3
hsa-miR-142-5p	RRM2B
hsa-miR-142-5p	MED17
hsa-miR-142-5p	UBE4A
hsa-miR-142-5p	ACTN4
hsa-miR-142-5p	CAPN7
hsa-miR-142-5p	GRSF1
hsa-miR-142-5p	JAG1
hsa-miR-142-5p	NMUR2
hsa-miR-142-5p	TMTC1
hsa-miR-142-5p	KRAS
hsa-miR-142-5p	MBD2
hsa-miR-142-5p	MRPS36
hsa-miR-142-5p	CCNB1
hsa-miR-142-5p	SLC38A2
hsa-miR-142-5p	ANO3
hsa-miR-142-5p	NEDD4L
hsa-miR-142-5p	RERG
hsa-miR-142-5p	ZCCHC11
hsa-miR-142-5p	RAB11FIP5
hsa-miR-142-5p	SLC41A2
hsa-miR-142-5p	IGF2BP3
hsa-miR-142-5p	STX17
hsa-miR-142-5p	DBR1
hsa-miR-142-5p	ITGAV
hsa-miR-142-5p	RAB21
hsa-miR-142-5p	NUP133
hsa-miR-142-5p	UBE2K
hsa-miR-142-5p	EPB41L4A
hsa-miR-142-5p	RNF138
hsa-miR-142-5p	TTC19
hsa-miR-142-5p	RPS6KA5
hsa-miR-142-5p	SPAG9
hsa-miR-142-5p	SLC11A2
hsa-miR-142-5p	MMD
hsa-miR-142-5p	ANKRD12
hsa-miR-142-5p	MID2
hsa-miR-142-5p	GAB1
hsa-miR-142-5p	TANC1
hsa-miR-142-5p	PTPN4
hsa-miR-142-5p	EPAS1
hsa-miR-142-5p	STK17B
hsa-miR-142-5p	CYTIP
hsa-miR-142-5p	RAB10
hsa-miR-142-5p	NPR3
hsa-miR-142-5p	ARRDC3
hsa-miR-142-5p	AFF4
hsa-miR-142-5p	NBN
hsa-miR-142-5p	SGCE
hsa-miR-142-5p	ANKIB1
hsa-miR-142-5p	HNRNPH3
hsa-miR-142-5p	RNF141
hsa-miR-142-5p	GLIPR1
hsa-miR-142-5p	NEDD1
hsa-miR-142-5p	EMC4
hsa-miR-142-5p	TCF12
hsa-miR-142-5p	BNIP2
hsa-miR-142-5p	CDR2
hsa-miR-142-5p	ZCCHC14
hsa-miR-142-5p	NPC1
hsa-miR-142-5p	ETAA1
hsa-miR-142-5p	VGLL4
hsa-miR-142-5p	SLC25A38
hsa-miR-142-5p	EPHA5
hsa-miR-142-5p	CISD2
hsa-miR-142-5p	2018-03-06
hsa-miR-142-5p	HAPLN1
hsa-miR-142-5p	FEM1C
hsa-miR-142-5p	MUT
hsa-miR-142-5p	HMGCLL1
hsa-miR-142-5p	PHIP
hsa-miR-142-5p	MAL2
hsa-miR-142-5p	BTBD10
hsa-miR-142-5p	ZC3H12C
hsa-miR-142-5p	NPAT
hsa-miR-142-5p	PLAC1L
hsa-miR-142-5p	FREM2
hsa-miR-142-5p	SLC7A11
hsa-miR-142-5p	MYCN
hsa-miR-142-5p	PDK1
hsa-miR-142-5p	TRIM36
hsa-miR-142-5p	PLEKHH2
hsa-miR-142-5p	ADAMTS18
hsa-miR-142-5p	RMND5A
hsa-miR-142-5p	ADAMTS1
hsa-miR-142-5p	MYO5B
hsa-miR-142-5p	RAB6B
hsa-miR-142-5p	KLF10
hsa-miR-142-5p	HSPA13
hsa-miR-142-5p	FZD7
hsa-miR-142-5p	ADAMTSL3
hsa-miR-142-5p	TIAM1
hsa-miR-142-5p	SASS6
hsa-miR-142-5p	APPL1
hsa-miR-142-5p	DUSP2
hsa-miR-142-5p	SON
hsa-miR-142-5p	STC1
hsa-miR-142-5p	ZFPL1
hsa-miR-142-5p	LHX8
hsa-miR-142-5p	CCNT2
hsa-miR-142-5p	SLC4A7
hsa-miR-142-5p	CCNL1
hsa-miR-142-5p	PGRMC2
hsa-miR-142-5p	F2RL1
hsa-miR-142-5p	TMEM65
hsa-miR-142-5p	PGM2L1
hsa-miR-142-5p	SLC18A2
hsa-miR-142-5p	ARHGEF40
hsa-miR-142-5p	TRUB1
hsa-miR-142-5p	CYB5A
hsa-miR-142-5p	TMX3
hsa-miR-142-5p	SLFN5
hsa-miR-142-5p	DIP2B
hsa-miR-142-5p	RGPD8
hsa-miR-142-5p	EMB
hsa-miR-142-5p	PCBP1
hsa-miR-142-5p	ARAP2
hsa-miR-142-5p	DTWD2
hsa-miR-142-5p	SOX7
hsa-miR-142-5p	PCNX
hsa-miR-142-5p	CHSY3
hsa-miR-142-5p	IRS1
hsa-miR-142-5p	S1PR1
hsa-miR-142-5p	CCDC132
hsa-miR-142-5p	ZNF239
hsa-miR-142-5p	ALCAM
hsa-miR-142-5p	B4GALT6
hsa-miR-142-5p	PDCD6IP
hsa-miR-142-5p	HOOK3
hsa-miR-142-5p	RSF1
hsa-miR-142-5p	REST
hsa-miR-142-5p	CGGBP1
hsa-miR-142-5p	GCC2
hsa-miR-142-5p	CLOCK
hsa-miR-142-5p	MSL2
hsa-miR-142-5p	NPAS4
hsa-miR-142-5p	ZNF624
hsa-miR-142-5p	LPP
hsa-miR-142-5p	ZBTB11
hsa-miR-142-5p	AQP11
hsa-miR-142-5p	BVES
hsa-miR-142-5p	PDS5B
hsa-miR-142-5p	ROCK2
hsa-miR-142-5p	YOD1
hsa-miR-142-5p	CLK4
hsa-miR-142-5p	CCNG2
hsa-miR-142-5p	UGDH
hsa-miR-142-5p	RBM44
hsa-miR-142-5p	MYO1D
hsa-miR-142-5p	ABL1
hsa-miR-142-5p	HSPH1
hsa-miR-142-5p	CLIP4
hsa-miR-142-5p	CHORDC1
hsa-miR-142-5p	TCP1
hsa-miR-142-5p	SFXN1
hsa-miR-142-5p	ULK1
hsa-miR-142-5p	UBA6
hsa-miR-142-5p	DDHD1
hsa-miR-142-5p	RNF128
hsa-miR-142-5p	USP9X
hsa-miR-142-5p	DIAPH2
hsa-miR-142-5p	MED14
hsa-miR-142-5p	HMGCS1
hsa-miR-142-5p	ANGPT2
hsa-miR-142-5p	PIBF1
hsa-miR-142-5p	CUL4A
hsa-miR-142-5p	B3GNT5
hsa-miR-142-5p	GDNF
hsa-miR-142-5p	DCBLD2
hsa-miR-142-5p	PSD3
hsa-miR-142-5p	C11ORF87
hsa-miR-142-5p	SPSB1
hsa-miR-142-5p	ST6GALNAC3
hsa-miR-142-5p	RGPD6
hsa-miR-142-5p	SLC25A21
hsa-miR-142-5p	PHF6
hsa-miR-142-5p	PIWIL3
hsa-miR-142-5p	C6ORF120
hsa-miR-142-5p	HOXB4
hsa-miR-142-5p	NR2C1
hsa-miR-142-5p	FIGN
hsa-miR-142-5p	RHOT1
hsa-miR-142-5p	CDC20B
hsa-miR-142-5p	ANGPTL5
hsa-miR-142-5p	DCUN1D4
hsa-miR-142-5p	DHRSX
[truncated: 347 more rows]
