# Supplementary material for: Identification of genes associated with survival of breast cancer patients
Source: Springer Nature journal article supplement (doi:10.1007/s12282-018-0926-9), 2018-10-19
Supplement: MOESM6 [file 16212838]

## Sheet: Table S4
Table S4 Spearman's correlation of miRNAs and their targets associated with overall survival of breast cancer patients.
			P for Overall Survival	Median survival time (days)*		P value for Spearman's correlation	Spearman's correlation
miRNA	Target genes	Gene ID		Low expression	High expression
hsa-miR-106b-5p	SCRN3	ENSG00000144306	0.025	4267	3669	5.82627e-28	-0.325994
	YTHDF3	ENSG00000185728	0.023	4456	3462	1.45838e-26	-0.317678
	ITFG1	ENSG00000129636	0.012	3959	3462	6.00434e-21	-0.281308
	JAK1	ENSG00000162434	0.035	3941	3926	1.65933e-17	-0.256034
	ARHGAP12	ENSG00000165322	0.047	6456	3669	6.08805e-16	-0.243567
	RB1CC1	ENSG00000023287	0.026	4456	3472	1.50588e-12	-0.213802
	OCRL	ENSG00000122126	0.003	3959	3873	1.17199e-09	-0.184439
	PPP6R3	ENSG00000110075	0.022	6456	3462	2.8776e-08	-0.168455
	ARHGEF3	ENSG00000163947	0.01	4456	3926	1.21763e-05	-0.133165
	IGSF10	ENSG00000152580	0.003	3736	4267	0.0247266	-0.0685866
	LACE1	ENSG00000135537	0.002	6456	3418	0.0461209	-0.0609247
	LRP1B	ENSG00000168702	0.004	3736	6456	0.0850082	-0.0526292
	SCN3A	ENSG00000153253	0.011	3472	3959	0.512357	-0.0200318
	FOXQ1	ENSG00000164379	0.029	3736	4456	0.520984	-0.019624
	ANKRD29	ENSG00000154065	0.037	3941	3669	0.71021	-0.0113616
	TCHH	ENSG00000159450	0.041	3926	3959	0.728419	0.0106173
	JRKL	ENSG00000183340	0.024	3945	3736	0.343471	0.0289614
	HMGB3	ENSG00000029993	0.014	3926	3959	0.301357	0.0315954
	ZNF367	ENSG00000165244	0.048	3945	3873	0.172603	0.0416869
	IRF1	ENSG00000125347	0.013	3736	3926	0.113669	0.0483436
	MRGPRX3	ENSG00000179826	0.032	3736	4267	0.0261005	0.0679487
	SLC43A2	ENSG00000167703	0.047	3736	6456	7.13804e-05	0.120998
	CHD5	ENSG00000116254	0.045	3926	3941	2.76189e-14	0.229555
hsa-miR-142-5p	TAF9B	ENSG00000187325	0.004	6593	3418	1.50747e-16	-0.24848
	RAD50	ENSG00000113522	0.02	6456	3418	2.62468e-14	-0.229748
	DIP2B	ENSG00000066084	0.005	6456	3461	1.46027e-07	-0.159731
	TTC19	ENSG00000011295	0.03	4456	3472	3.887e-07	-0.154236
	DCUN1D4	ENSG00000109184	0.042	6456	3472	2.91648e-05	-0.127293
	PPP1R3D	ENSG00000132825	0.03	4456	3736	7.07643e-05	-0.121061
	MYO1D	ENSG00000176658	0.002	6456	3462	8.52232e-05	-0.119715
	RCN2	ENSG00000117906	0.017	3941	3873	0.000503466	-0.106078
	GRSF1	ENSG00000132463	0.035	4456	3472	0.000523766	-0.105756
	SLC25A21	ENSG00000183032	0.048	3472	4267	0.000617513	-0.104407
	ZCCHC14	ENSG00000140948	0.03	3959	3462	0.000648238	-0.104006
	MAL2	ENSG00000147676	0.002	6593	3462	0.00147837	-0.0969752
	CCSER1	ENSG00000184305	0.024	6456	3462	0.00957058	-0.0791026
	ITPRIPL2	ENSG00000205730	0.018	6456	3418	0.0142596	-0.0748312
	SYCP2	ENSG00000196074	0.049	4456	3461	0.0339343	-0.0647833
	RFX3	ENSG00000080298	0.004	3736	3945	0.0352869	-0.0643017
	PCDHB16	ENSG00000272674	0.019	4456	3462	0.291986	-0.032214
	UBE2A	ENSG00000077721	0.003	3945	3873	0.384253	-0.0266008
	LRP1B	ENSG00000168702	0.004	3736	6456	0.569092	-0.0174095
	TCP1	ENSG00000120438	0.004	3941	3873	0.584857	-0.0167037
	SORBS1	ENSG00000095637	0.001	3941	3926	0.667566	-0.0131324
	ZFYVE26	ENSG00000072121	0.043	3873	3945	0.80381	-0.00759606
	SMIM17	ENSG00000268182	0.045	6456	3462	0.852201	-0.00569699
	PLEKHA8	ENSG00000106086	0.029	6456	3873	0.885734	-0.00439419
	MED17	ENSG00000042429	0.013	4456	3669	0.925591	0.00285577
	CHORDC1	ENSG00000110172	0.024	3941	3736	0.83745	0.00627321
	ASB11	ENSG00000165192	0.021	6456	3492	0.749201	0.00977534
	CNEP1R1	ENSG00000205423	0.038	3945	3736	0.163917	0.0425459
	TVP23C	ENSG00000175106	0.035	3736	4267	0.12776	0.0465449
	ADAMTS18	ENSG00000140873	0.03	3945	3926	0.127328	0.0465977
	CEP57L1	ENSG00000183137	0.008	3926	3941	0.126288	0.0467254
	DYNLT1	ENSG00000146425	0.007	3873	3941	0.11855	0.0477018
	TMEM65	ENSG00000164983	0	6456	3472	0.0700617	0.05535
	SGCE	ENSG00000127990	0.035	3736	4267	0.010444	0.0781835
	ANKRD29	ENSG00000154065	0.037	3941	3669	0.00490812	0.0858572
	NT5E	ENSG00000135318	0.015	4456	3492	0.00339105	0.0894101
	NR1I2	ENSG00000144852	0.026	3492	6593	0.00019238	0.11365
	MMD	ENSG00000108960	0.045	4267	3669	2.71586e-05	0.127781
	EMB	ENSG00000170571	0.028	3926	3945	5.00559e-06	0.138898
	N4BP2L1	ENSG00000139597	0.032	3736	3945	1.92756e-08	0.170539
	SLAIN1	ENSG00000139737	0.005	3736	3959	6.7179e-18	0.259059
	NCOA7	ENSG00000111912	0.042	3462	6456	5.96542e-18	0.259453
	ENAM	ENSG00000132464	0.03	3472	3959	4.60562e-24	0.302125
	CACNA1E	ENSG00000198216	0.025	3492	6456	4.37537e-29	0.332497
	TMEM71	ENSG00000165071	0.029	3472	4267	2.34202e-39	0.385727
	TOX	ENSG00000198846	0.009	3873	3959	2.19415e-72	0.511072
	CD69	ENSG00000110848	0.014	3736	3959	2.17191e-89	0.559658
	SH2D1A	ENSG00000183918	0.004	3873	3669	2.08695e-135	0.660636
hsa-miR-148b-3p	RASGRP1	ENSG00000172575	0.019	3945	3873	0.316905	-0.0305965
	CHUK	ENSG00000213341	0.038	4456	3472	0.454186	0.0228833
hsa-miR-193a-5p	RBM41	ENSG00000089682	0.037	4456	3873	0.014645	-0.0745384
	NKIRAS1	ENSG00000197885	0.028	3945	3926	0.0291217	-0.066642
	THEMIS	ENSG00000172673	0.007	3873	3959	0.599943	-0.0160366
	TRAT1	ENSG00000163519	0.001	3736	3959	0.790626	-0.00811825
	ADAM22	ENSG00000008277	0.043	3959	3873	0.577214	0.0170448
	TP63	ENSG00000073282	0.049	3736	4267	0.479409	0.0216239
	SP5	ENSG00000204335	0.023	3472	3959	0.0093262	0.0793731
	CLCA2	ENSG00000137975	0.026	3472	6456	0.000514022	0.105909
	MYO15A	ENSG00000091536	0.01	3669	6456	4.21906e-12	0.209538
hsa-miR-196a-5p	RASGRP1	ENSG00000172575	0.019	3945	3873	3.60931e-13	-0.219568
	RDX	ENSG00000137710	0.002	4267	3669	5.54098e-06	-0.138254
	GRPEL2	ENSG00000164284	0.007	4456	3462	0.00216968	-0.0935456
	OTUD6B	ENSG00000155100	0.013	4456	3462	0.00468045	-0.0863206
	AQP4	ENSG00000171885	0.03	3736	3959	0.0533814	-0.0590198
	GUF1	ENSG00000151806	0.024	4267	3472	0.138499	-0.0452752
	OR7D2	ENSG00000188000	0.025	3941	3926	0.202278	-0.0389749
	TTC26	ENSG00000105948	0.028	3926	3945	0.743986	-0.00998589
	SDCBP	ENSG00000137575	0.043	4456	3472	0.864145	-0.00523187
	ZNF385B	ENSG00000144331	0.003	3472	6456	0.216055	0.0378142
	ZCCHC3	ENSG00000247315	0.027	3492	3959	0.0398968	0.0627703
	GPRASP1	ENSG00000198932	0.031	3941	3926	0.00037436	0.108461
hsa-miR-21-3p	YIPF4	ENSG00000119820	0.035	3945	3736	2.17136e-08	-0.169922
	OCRL	ENSG00000122126	0.003	3959	3873	0.00136764	-0.0976583
	DAXX	ENSG00000204209	0.004	3418	6456	0.00326837	-0.0897576
	TMEM164	ENSG00000157600	0.036	3959	3945	0.00740003	-0.0817595
	PCGF5	ENSG00000180628	0.041	3941	3873	0.0106351	-0.0779916
	AIFM1	ENSG00000156709	0.041	3926	3941	0.0516682	-0.0594488
	PEG3	ENSG00000198300	0.041	4456	3472	0.0870397	-0.0522901
	SAR1A	ENSG00000079332	0.049	3941	3736	0.0981646	-0.0505382
	NAA15	ENSG00000164134	0.036	6456	3462	0.324692	-0.0301083
	DCUN1D4	ENSG00000109184	0.042	6456	3472	0.337008	-0.0293515
	PPP6R3	ENSG00000110075	0.022	6456	3462	0.352933	-0.0283987
	USP45	ENSG00000123552	0.042	4267	3873	0.4706	-0.0220595
	STRAP	ENSG00000023734	0.012	4267	3736	0.487483	-0.0212285
	GSE1	ENSG00000131149	0.041	3926	3941	0.622368	-0.0150588
	AMD1	ENSG00000123505	0.002	6456	3472	0.754602	-0.00955779
	SORCS1	ENSG00000108018	0.036	3959	3926	0.84026	0.00616327
	GPM6A	ENSG00000150625	0.014	3926	3945	0.648001	0.0139594
hsa-miR-365a-3p	LAMP2	ENSG00000005893	0.006	4456	3472	2.15503e-15	-0.239023
	IMPAD1	ENSG00000104331	0.027	4456	3472	6.7433e-10	-0.187059
	RAD1	ENSG00000113456	0.009	3945	3736	3.43315e-05	-0.126168
	GRPEL2	ENSG00000164284	0.007	4456	3462	4.01856e-05	-0.125073
	TBCEL	ENSG00000154114	0.022	4456	3669	0.019022	-0.0716164
	MS4A1	ENSG00000156738	0.022	3873	3959	0.0711006	-0.0551463
	USP45	ENSG00000123552	0.042	4267	3873	0.167662	-0.0421714
	ATG2B	ENSG00000066739	0.031	6456	3462	0.198382	-0.0393135
	DIP2C	ENSG00000151240	0.032	4456	3462	0.346242	-0.0287956
	TP63	ENSG00000073282	0.049	3736	4267	0.64867	-0.013931
	NR3C2	ENSG00000151623	0.003	3736	NA	0.723893	0.0108017
	ARHGAP12	ENSG00000165322	0.047	6456	3669	0.329038	0.0298392
	TLL2	ENSG00000095587	0.038	4267	3873	0.0404317	0.0626024
	IGF1R	ENSG00000140443	0.001	3472	3945	0.0403818	0.062618
	LUC7L2	ENSG00000146963	0.003	3492	4456	0.0198554	0.0711282
	MAK	ENSG00000111837	0.023	3472	3945	0.000796229	0.102293
	ZNF486	ENSG00000256229	0.011	7455	3669	0.000499798	0.106137
	GRAMD1C	ENSG00000178075	0.033	3873	4267	4.23107e-06	0.139957
hsa-miR-365b-3p	LAMP2	ENSG00000005893	0.006	4456	3472	2.07852e-15	-0.239155
	IMPAD1	ENSG00000104331	0.027	4456	3472	6.38508e-10	-0.187316
	RAD1	ENSG00000113456	0.009	3945	3736	3.41971e-05	-0.126195
	GRPEL2	ENSG00000164284	0.007	4456	3462	4.06018e-05	-0.125001
	TBCEL	ENSG00000154114	0.022	4456	3669	0.0191295	-0.0715524
	MS4A1	ENSG00000156738	0.022	3873	3959	0.0706549	-0.0552334
	USP45	ENSG00000123552	0.042	4267	3873	0.169019	-0.0420373
	ATG2B	ENSG00000066739	0.031	6456	3462	0.198572	-0.0392969
	DIP2C	ENSG00000151240	0.032	4456	3462	0.346301	-0.0287921
	TP63	ENSG00000073282	0.049	3736	4267	0.650743	-0.0138429
	NR3C2	ENSG00000151623	0.003	3736	NA	0.724471	0.0107781
	ARHGAP12	ENSG00000165322	0.047	6456	3669	0.328661	0.0298624
	TLL2	ENSG00000095587	0.038	4267	3873	0.0403187	0.0626377
	IGF1R	ENSG00000140443	0.001	3472	3945	0.0401236	0.0626989
	LUC7L2	ENSG00000146963	0.003	3492	4456	0.0194756	0.0713484
	MAK	ENSG00000111837	0.023	3472	3945	0.000783075	0.102432
	ZNF486	ENSG00000256229	0.011	7455	3669	0.000485972	0.106365
	GRAMD1C	ENSG00000178075	0.033	3873	4267	4.11682e-06	0.140129
hsa-miR-9-5p	SCUBE2	ENSG00000175356	0.015	4456	3926	4.07773e-45	-0.411733
	ITPRIPL2	ENSG00000205730	0.018	6456	3418	1.31633e-19	-0.271777
	ANO6	ENSG00000177119	0.006	6456	3462	1.74339e-12	-0.213201
	PCSK6	ENSG00000140479	0.003	3669	NA	9.39127e-10	-0.185494
	CTNNA1	ENSG00000044115	0.027	6593	3462	8.40685e-09	-0.174775
	WDR6	ENSG00000178252	0.038	3736	3945	2.08924e-08	-0.170122
	RARS	ENSG00000113643	0.025	6593	3462	1.08647e-07	-0.161354
	ELOVL2	ENSG00000197977	0.005	3959	3736	3.09581e-07	-0.15553
	EIF4E	ENSG00000151247	0.014	6456	3472	1.27092e-06	-0.147319
	EMB	ENSG00000170571	0.028	3926	3945	1.1621e-05	-0.133471
	SNRK	ENSG00000163788	0.031	4267	3873	2.41326e-05	-0.128587
	PCGF5	ENSG00000180628	0.041	3941	3873	0.000155756	-0.115252
	PIGM	ENSG00000143315	0.022	4267	3418	0.0015908	-0.0963283
	LDLRAP1	ENSG00000157978	0.032	3418	6456	0.00376375	-0.0884205
	GRSF1	ENSG00000132463	0.035	4456	3472	0.00533477	-0.0850389
	TULP4	ENSG00000130338	0.015	6593	3462	0.0294195	-0.0665197
	HLCS	ENSG00000159267	0.012	4456	3462	0.0818838	-0.0531638
	ADAM22	ENSG00000008277	0.043	3959	3873	0.0978596	-0.050584
	SRGAP3	ENSG00000196220	0.034	3873	3941	0.117564	-0.0478297
	MAGT1	ENSG00000102158	0.001	4267	3472	0.269802	-0.0337338
	SLC20A2	ENSG00000168575	0.002	6456	3461	0.273151	-0.0334991
	RFX3	ENSG00000080298	0.004	3736	3945	0.499524	-0.0206453
	CYB561	ENSG00000008283	0.007	3959	3873	0.526625	-0.0193592
	ARID1B	ENSG00000049618	0.001	6593	3669	0.588718	-0.0165322
	FREM1	ENSG00000164946	0.019	3873	3959	0.727901	-0.0106384
	LHFPL2	ENSG00000145685	0.04	4267	3669	0.878416	-0.00467774
	STK3	ENSG00000104375	0.019	4456	3472	0.821706	0.00689073
	CEP104	ENSG00000116198	0.017	6456	3492	0.810509	0.00733158
	THEMIS	ENSG00000172673	0.007	3873	3959	0.618098	0.0152437
	ICMT	ENSG00000116237	0.014	4267	3873	0.556637	0.0179737
	ENPEP	ENSG00000138792	0.018	3959	3492	0.330296	0.0297617
	DCUN1D4	ENSG00000109184	0.042	6456	3472	0.165567	0.0423802
	P4HA2	ENSG00000072682	0	3926	3941	0.0635597	0.0566845
	TENM1	ENSG00000009694	0.017	3472	3959	0.0339398	0.0647814
	KIF21A	ENSG00000139116	0.046	3945	3941	0.0206578	0.0706746
	FGF9	ENSG00000102678	0.02	3873	3945	2.64415e-06	0.142878
	FAM155B	ENSG00000130054	0.002	4456	3462	3.21285e-07	0.15532
	GRHL1	ENSG00000134317	0.026	3941	3926	1.72177e-08	0.171122
	EDAR	ENSG00000135960	0.003	3736	3959	2.69054e-09	0.180427
	POU3F2	ENSG00000184486	0.004	3959	3472	2.68893e-09	0.18043
	YIPF4	ENSG00000119820	0.035	3945	3736	2.36169e-09	0.181063
	CC2D1B	ENSG00000154222	0.035	3461	6593	2.96279e-18	0.261763
hsa-miR-99a-5p	ZNF845	ENSG00000213799	0.008	6456	3462	3.95523e-07	-0.154137
	PPP3CA	ENSG00000138814	0.043	7455	3462	0.511623	0.0200667
* NA indicates that more than a half patients were still alive.
